# Supplementary material for: Comparative morphological and molecular analysis confirms the presence of the West Nile virus mosquito vector, Culex univittatus, in the Iberian Peninsula
Source: PubMed Central journal article supplement (PMC5123335; doi:10.1186/s13071-016-1877-7), 2016-11-25

# *Culex (Culex) univittatus*

From Portugal and South Africa, Gauteng Province.

Dissected genitalia microscope photos.

# Port-2.1/C6R; Gonocoxite, X100

- 

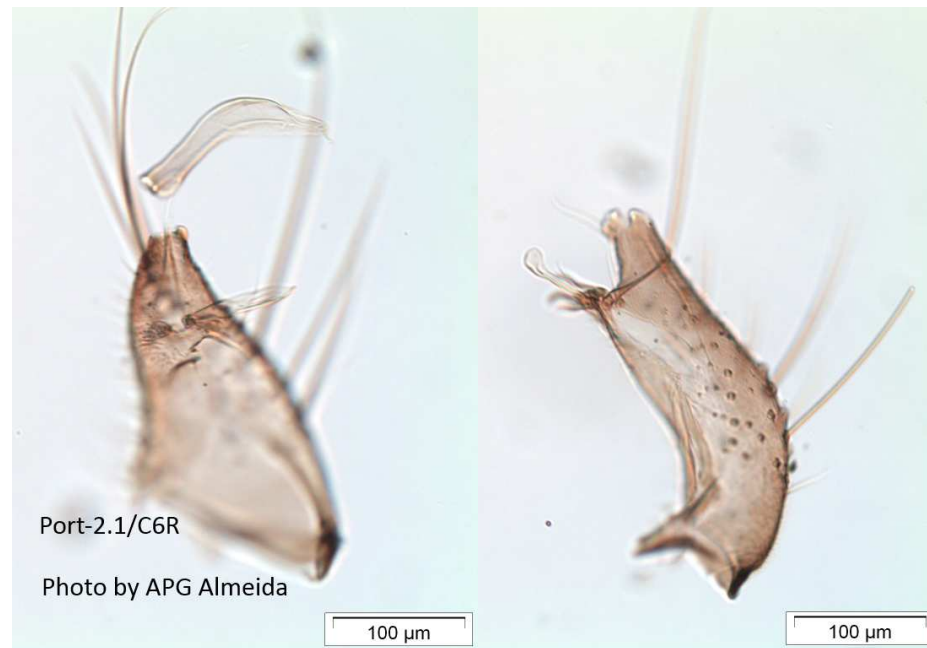

# Port-2.1/C6R; Phallosome, X200

- 

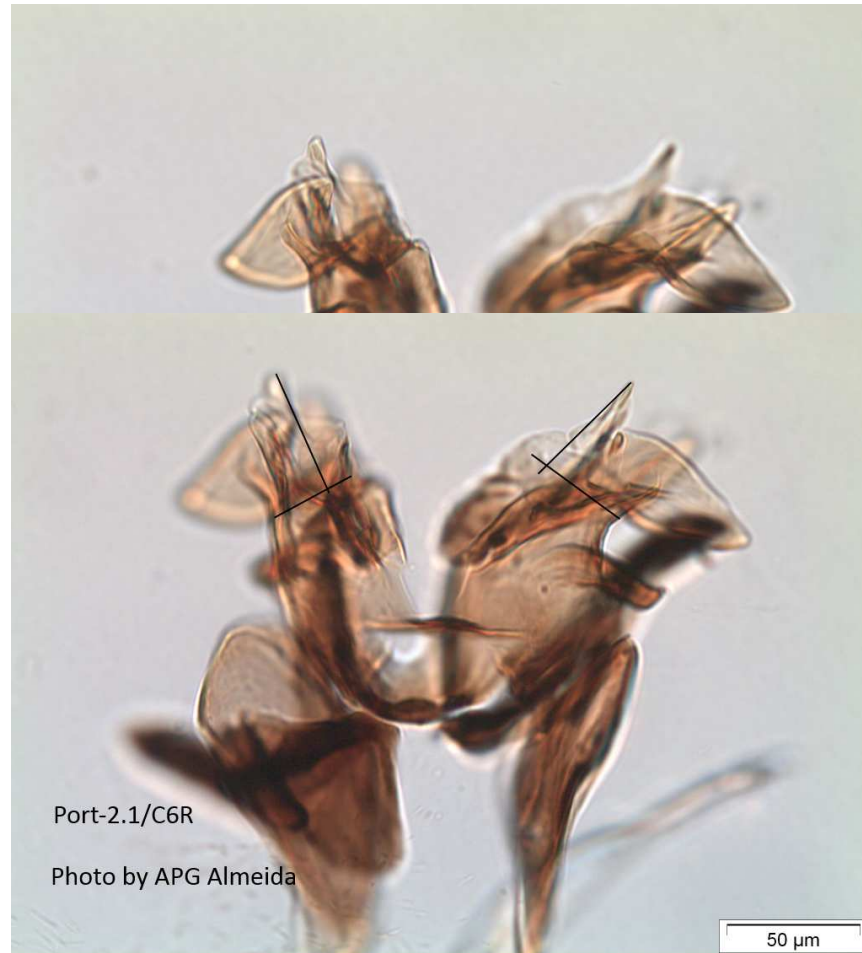

# Port-2.1/C6R; Phallosome, X200

- (remounted)

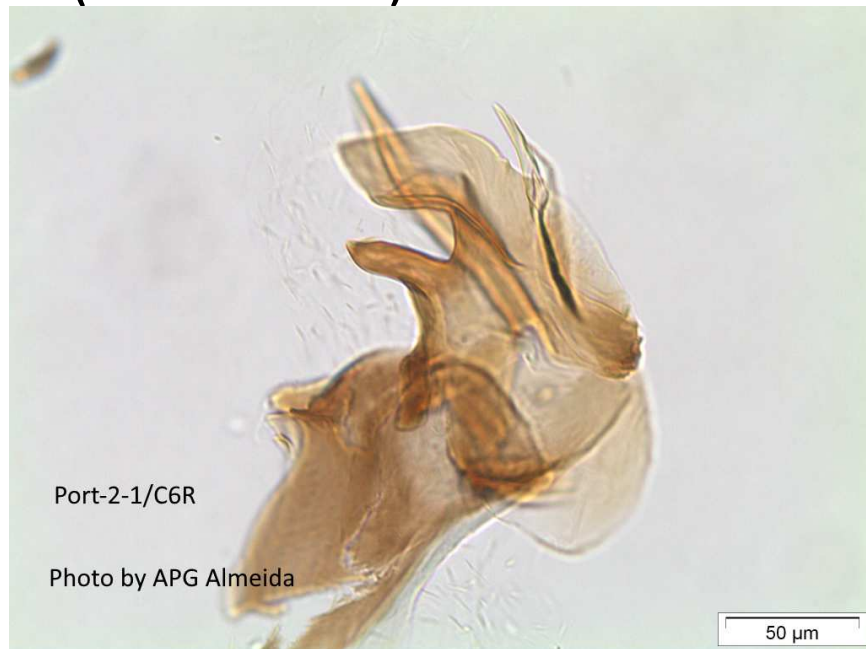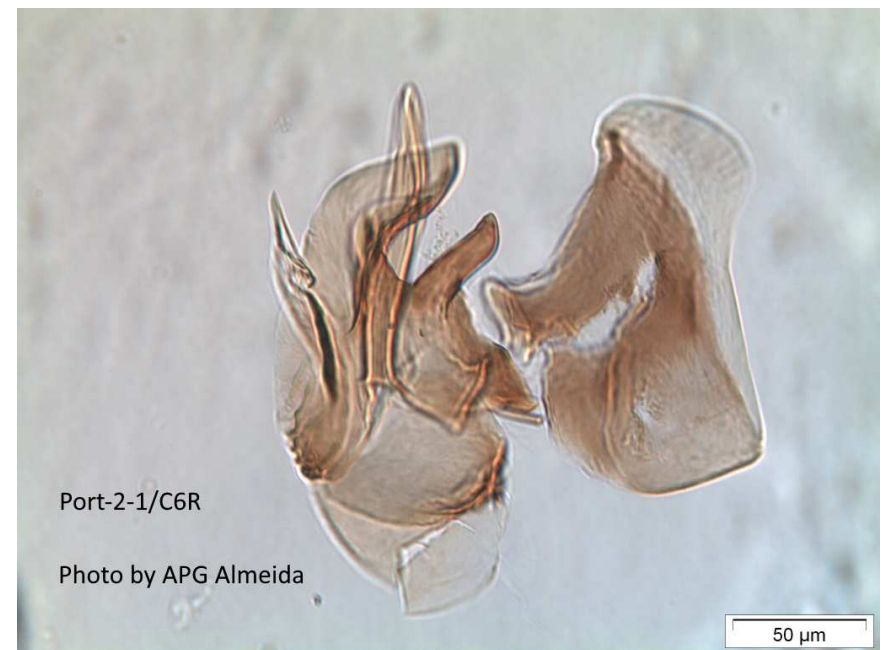

# Port-2.2/C7; Gonocoxite, X100

- 

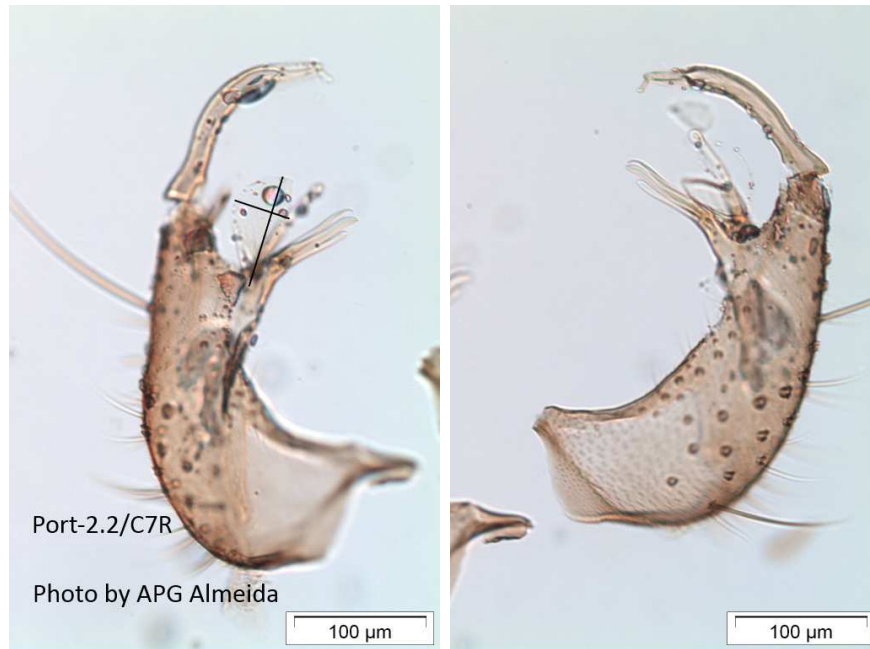

# Port-2.2/C7; Phallosome, X200

- 

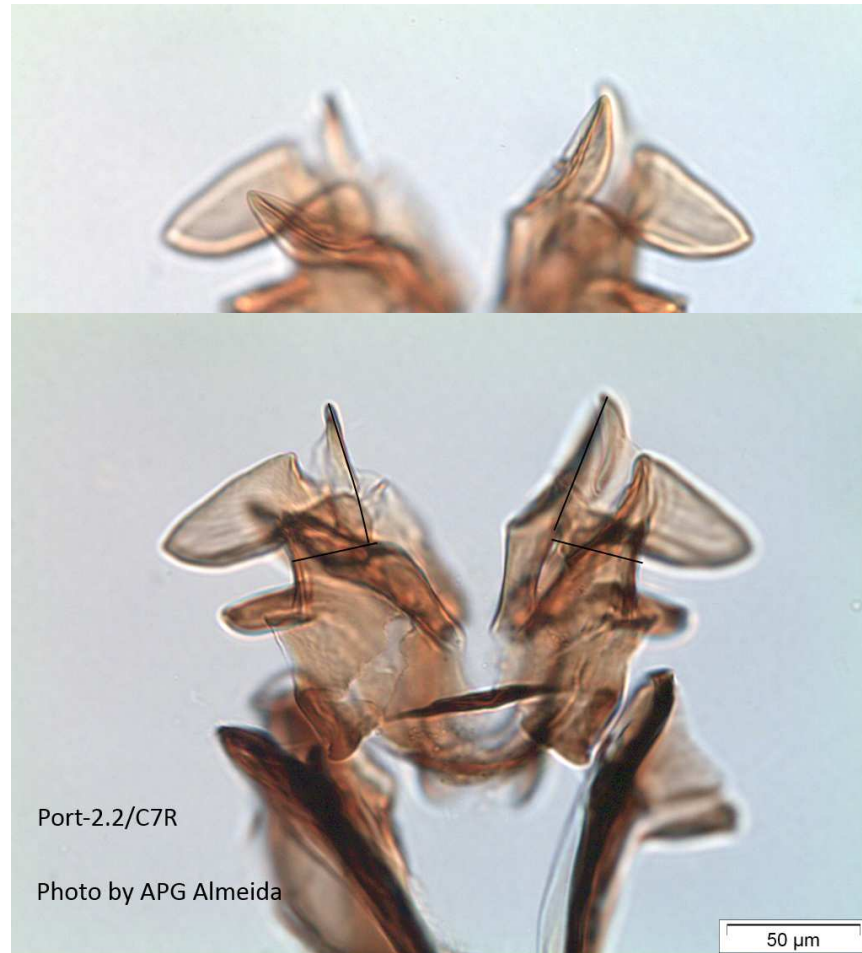

# Port-2.2/C7; Phallosome, X200

- (remounted)

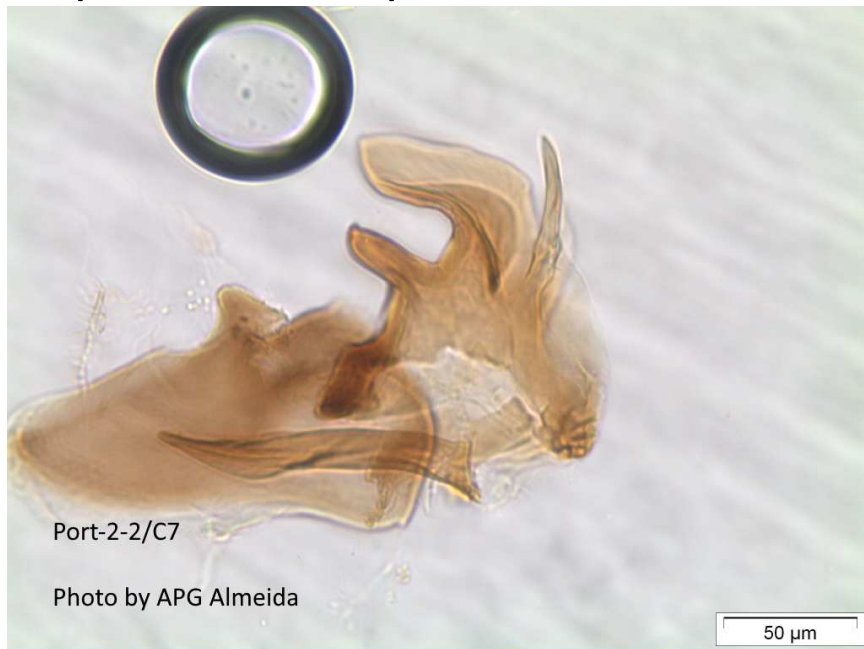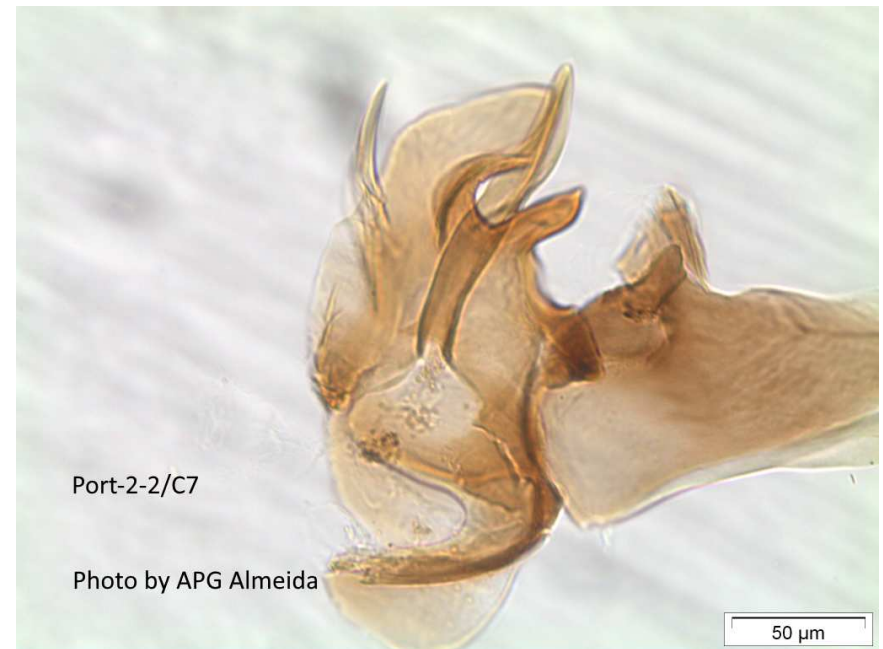

# Port-2448.1/C1; Gonocoxite, X200

- 

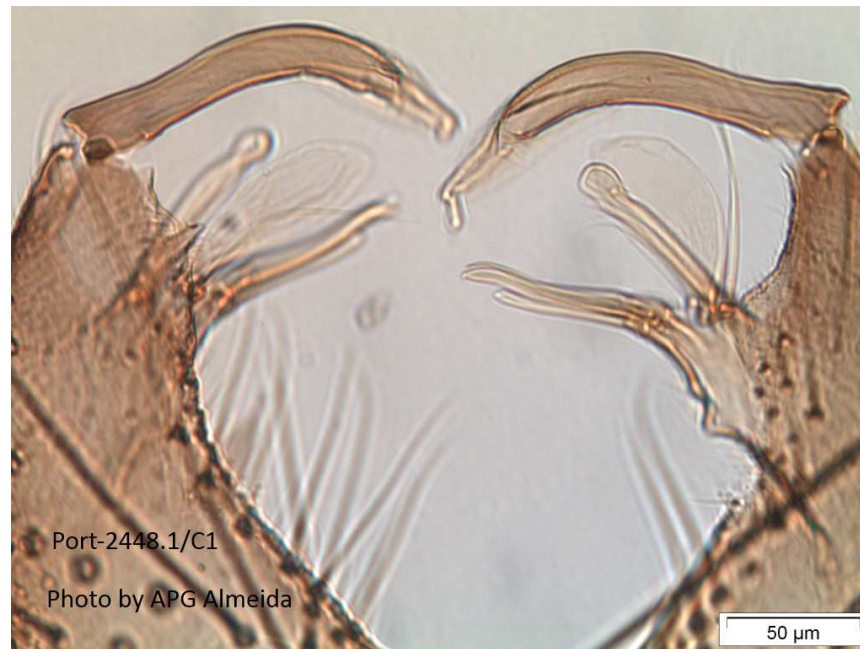



# Port-2448.1/C1; Phallosome, X200

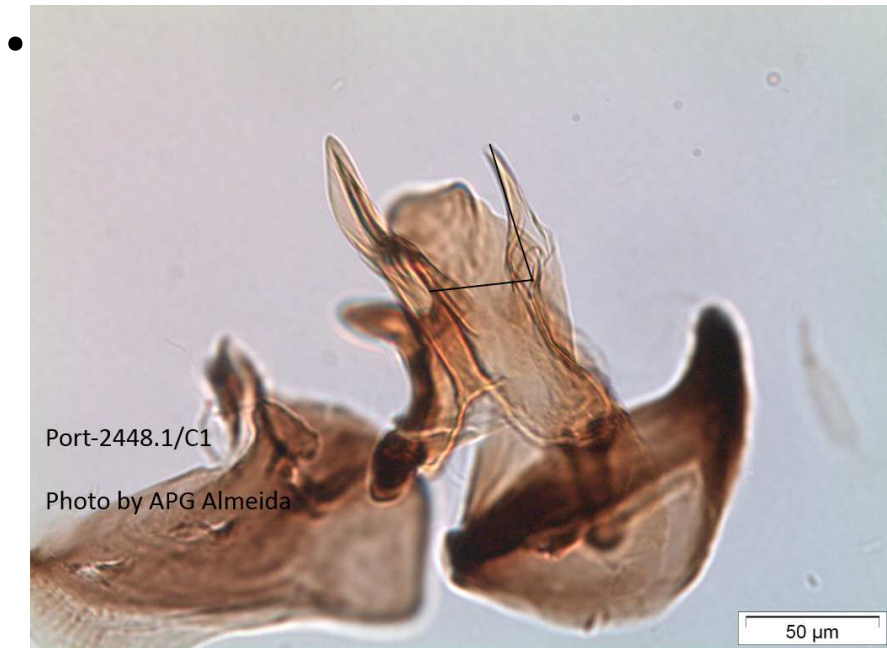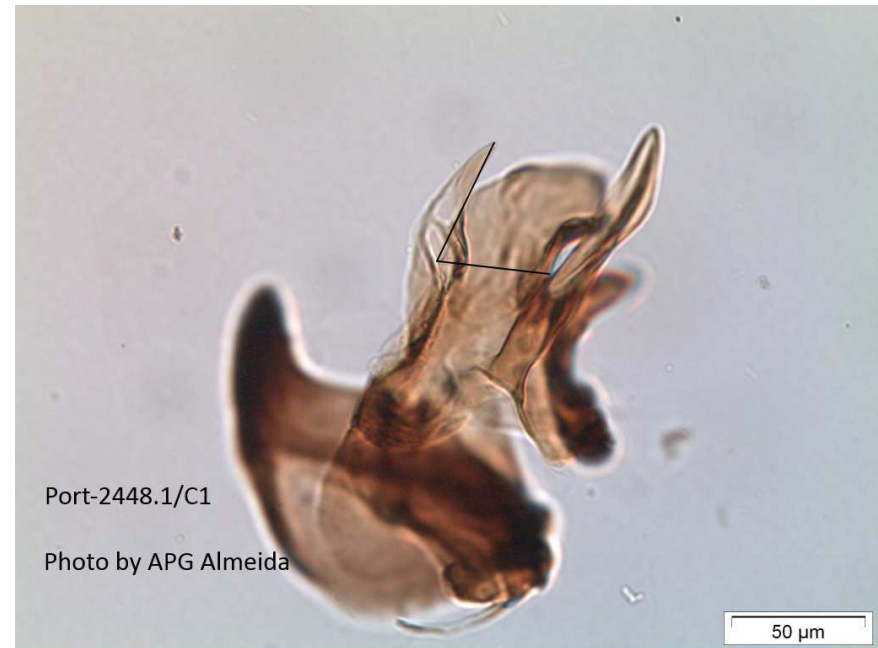

# Port-2449.1; Gonocoxite, X100

- 

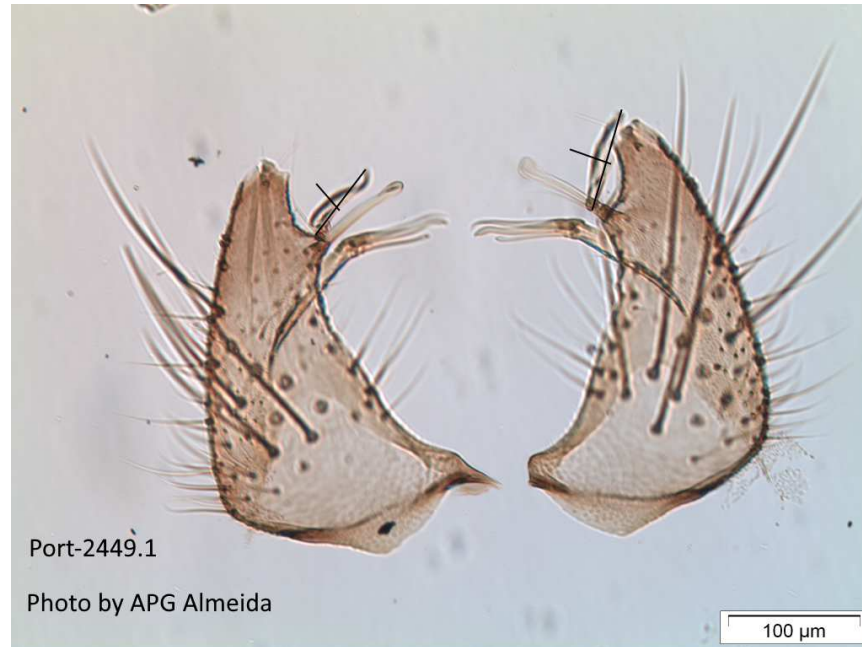

# Port-2449.1; Phallosome, X200

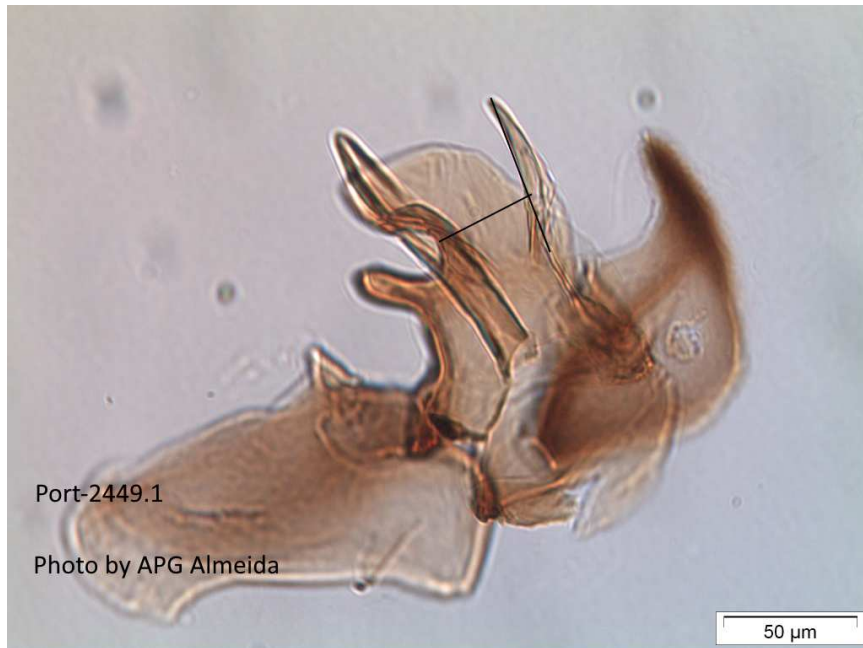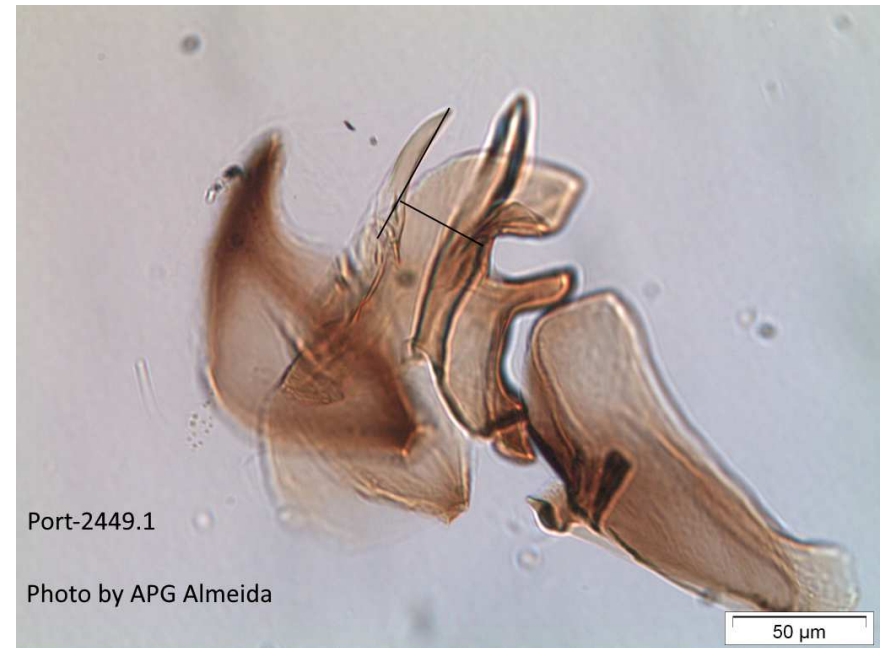

# Port-2460.1; Gonocoxite, X100

- 

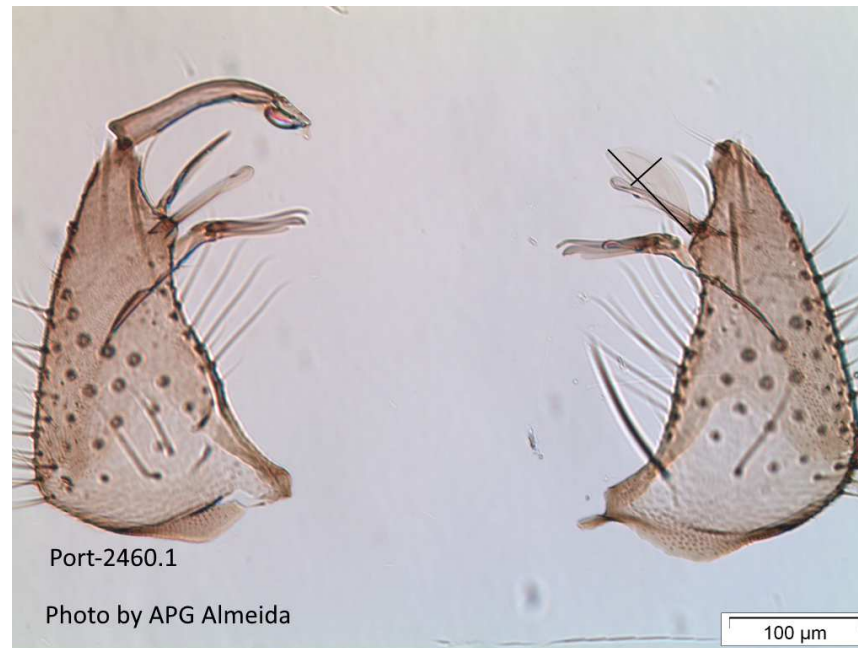

# Port-2460.1; Phallosome, X200

•

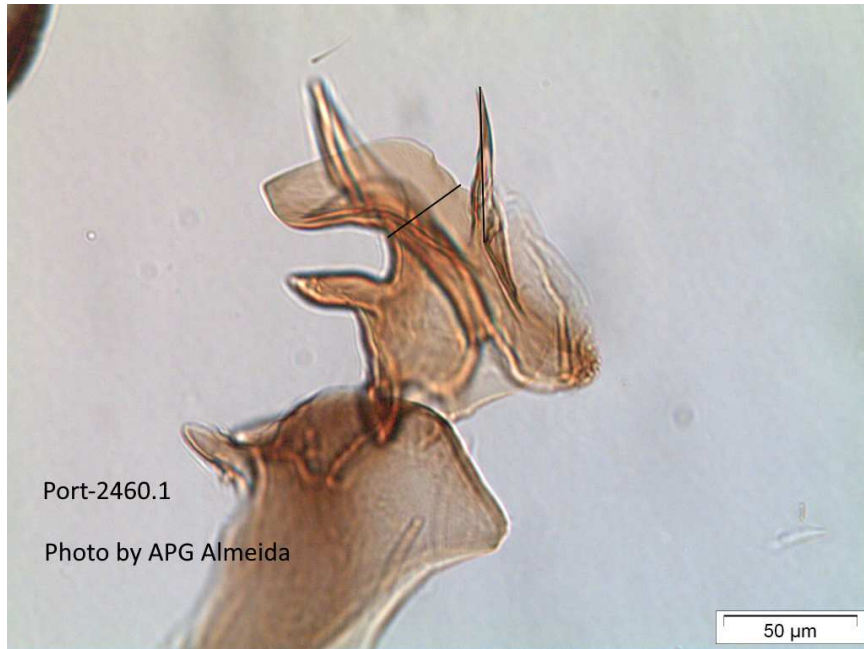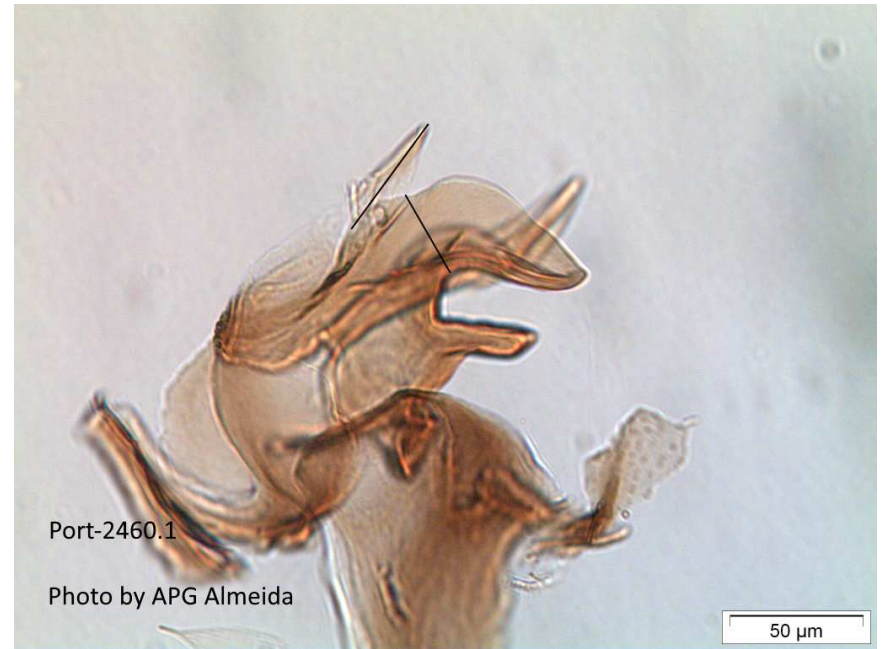

# Port-2465.1/C4; Gonocoxite, X100

- 

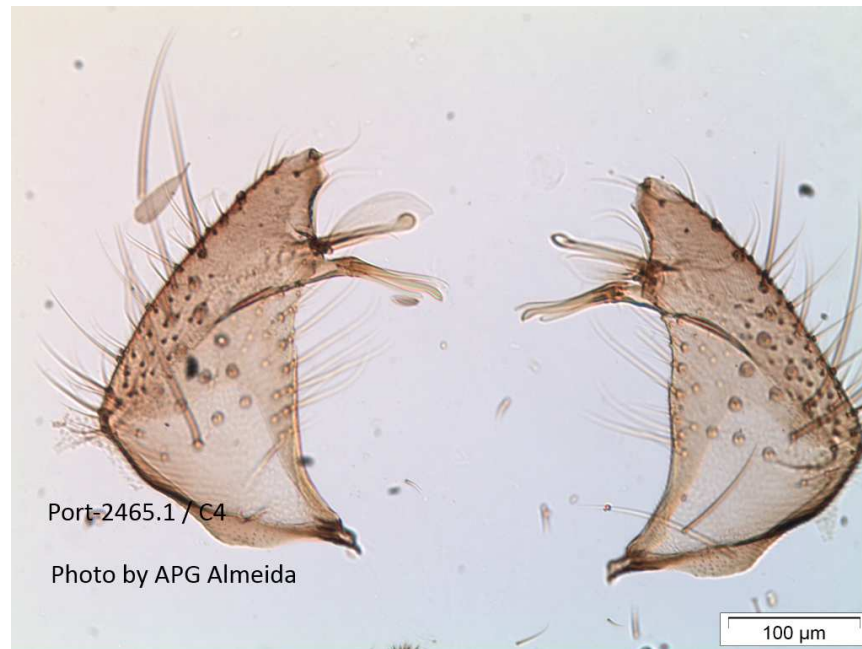

# Port-2465.1/C4; Phallosome, X200

- 

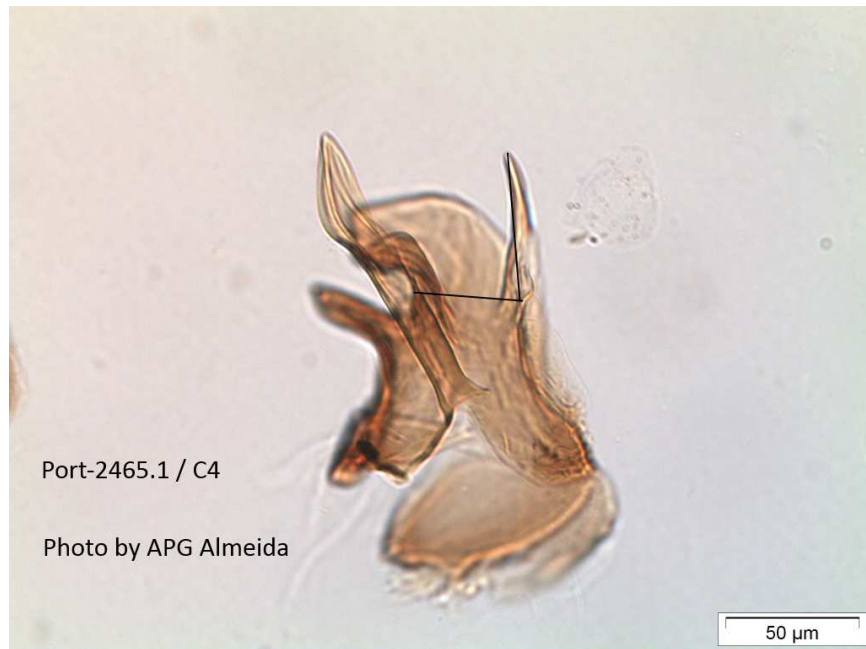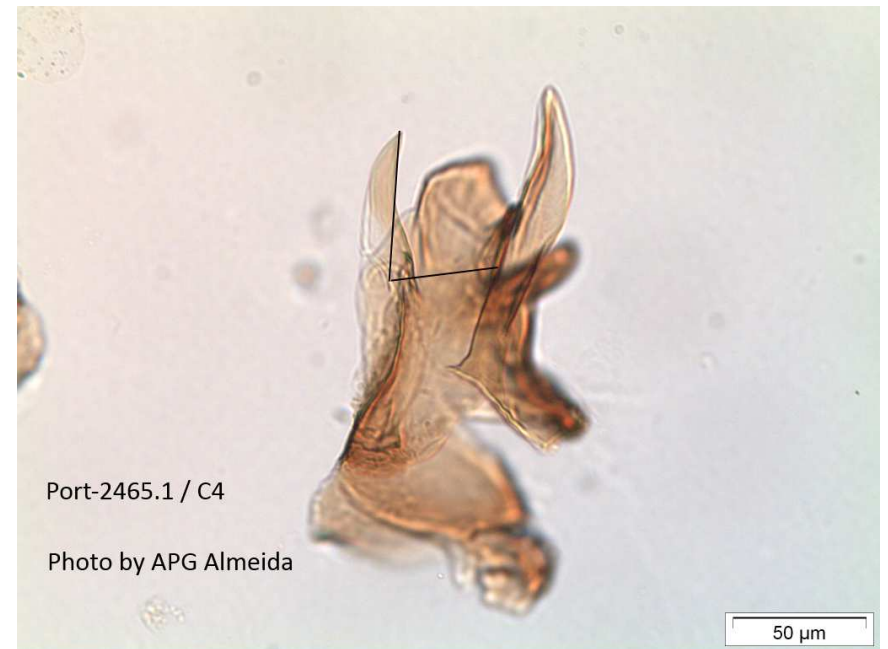

# Port-2474.2; Gonocoxite, X100

- a marcação na foto está errada, é 2

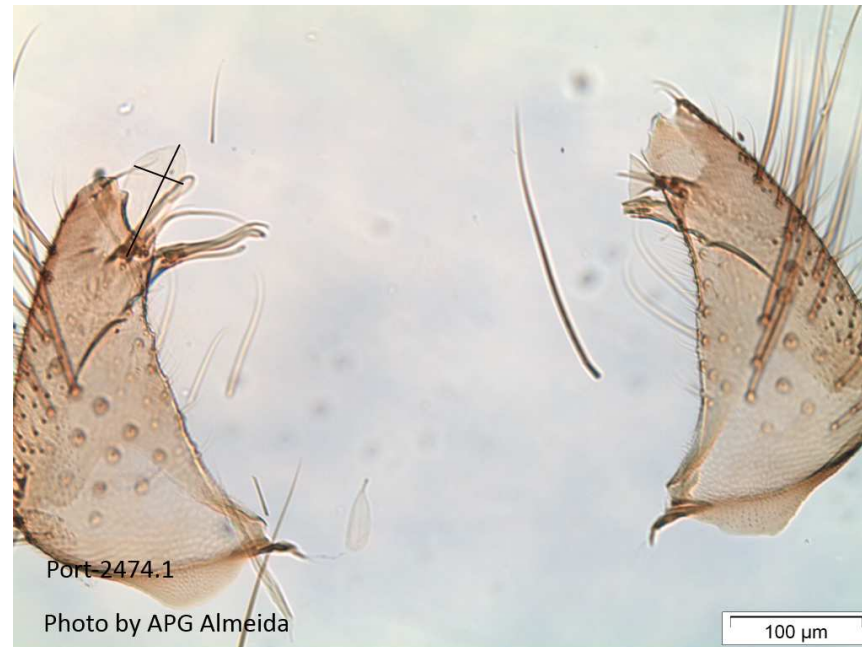



# Port-2474.2; Phallosome, X200

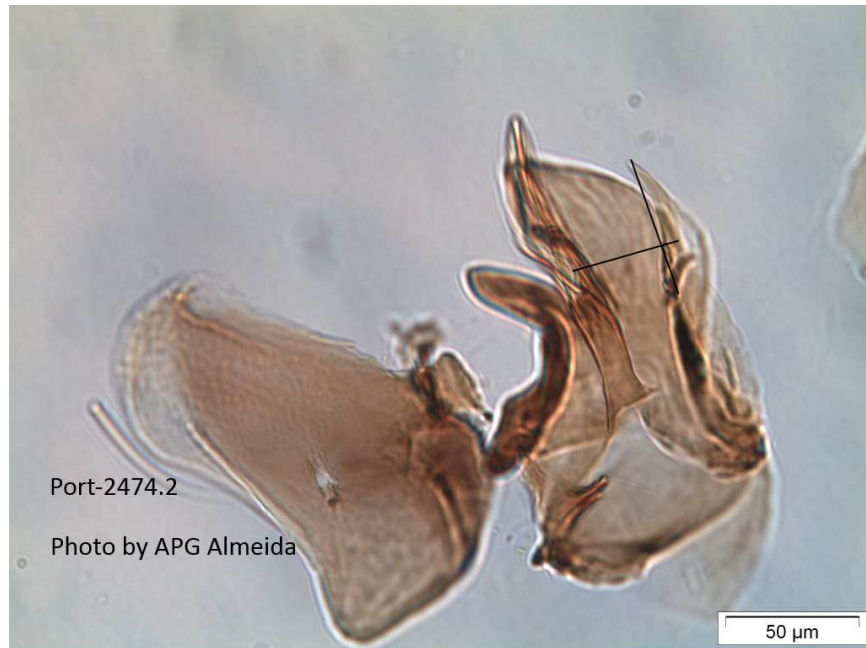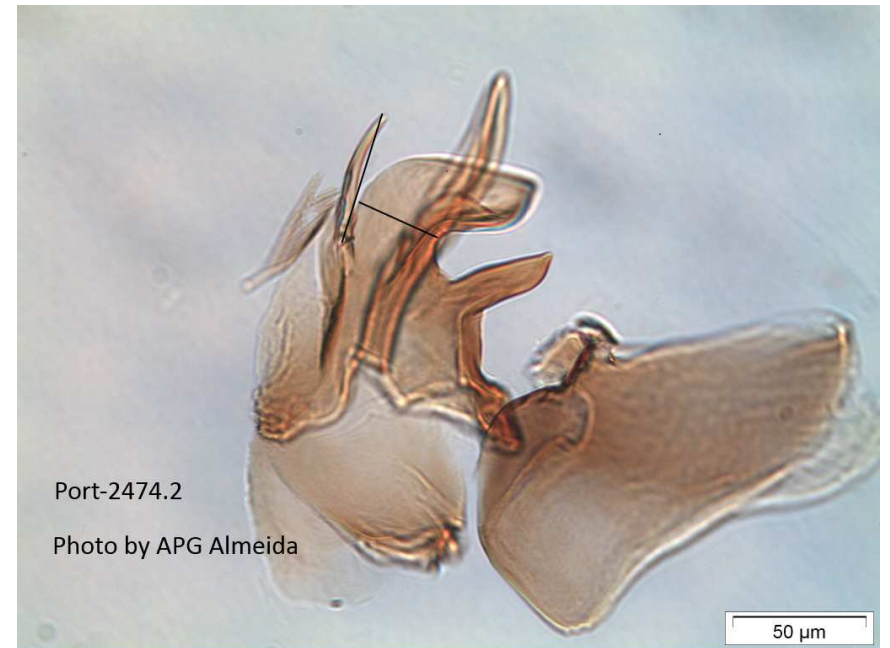

# Port-2630.69/3435; Gonocoxite, X100

- (first and second mounting)

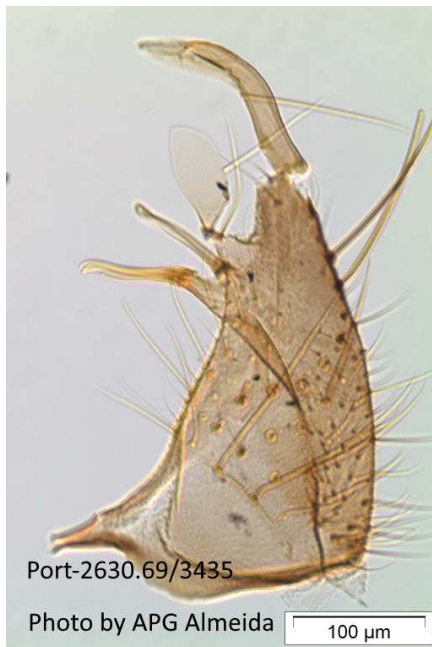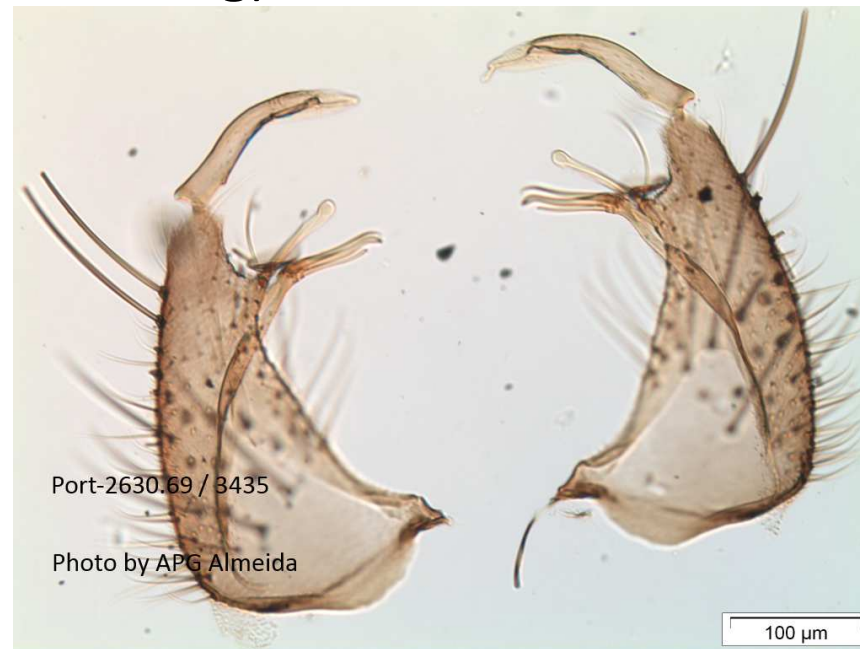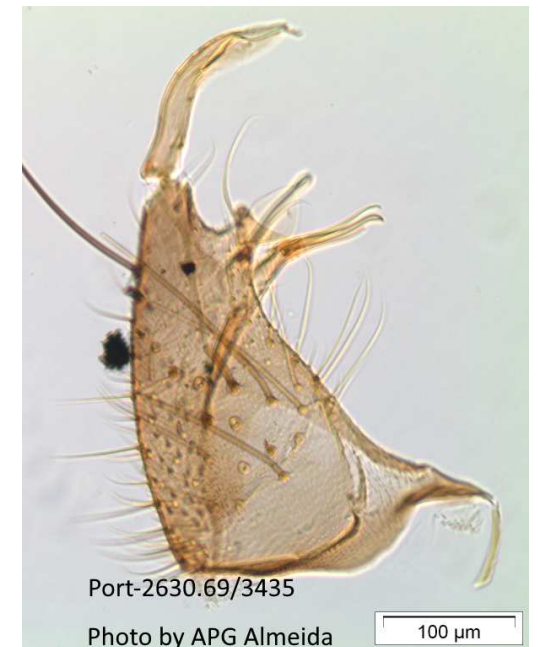

# Port-2630.69/3435; Phallosome, X200

- 

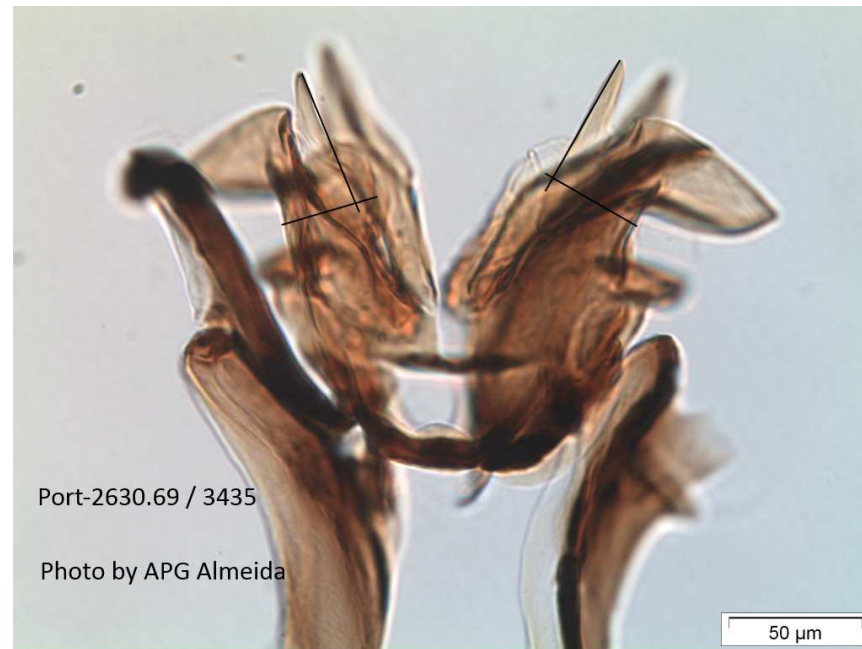

# Port-2630.69/3435; Phallosome, X200

- (remounted)

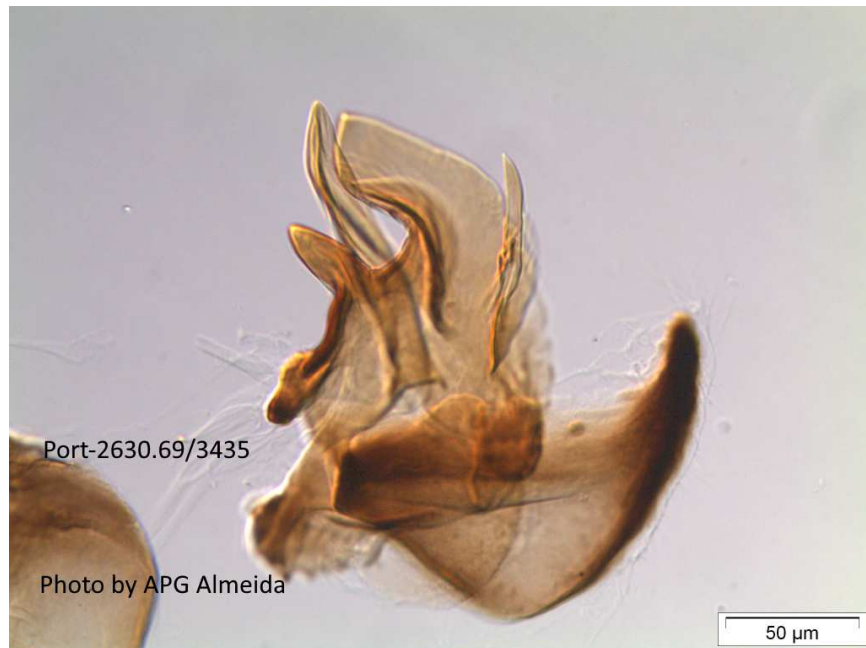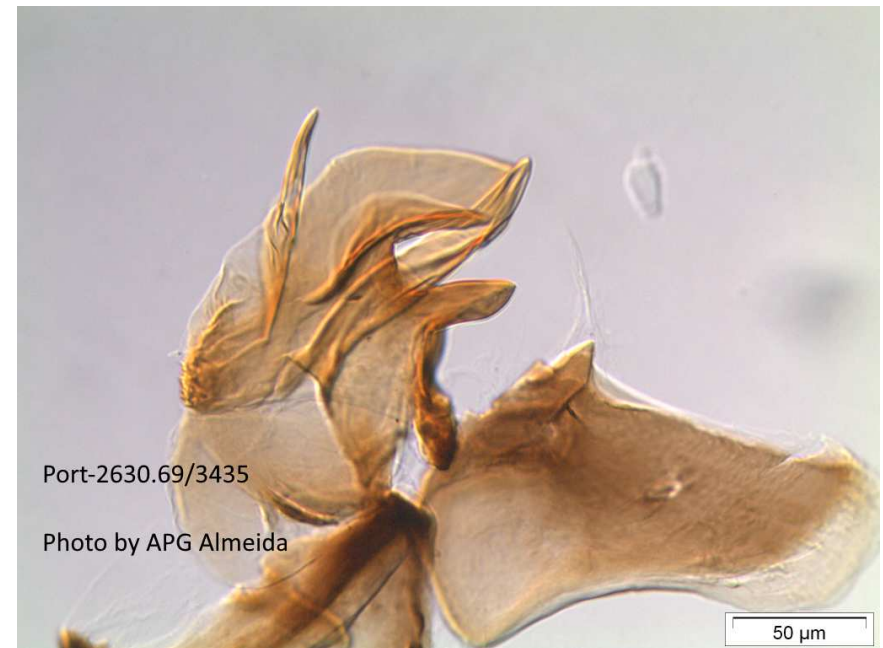

# Port-3437; Gonocoxite, X200

- 

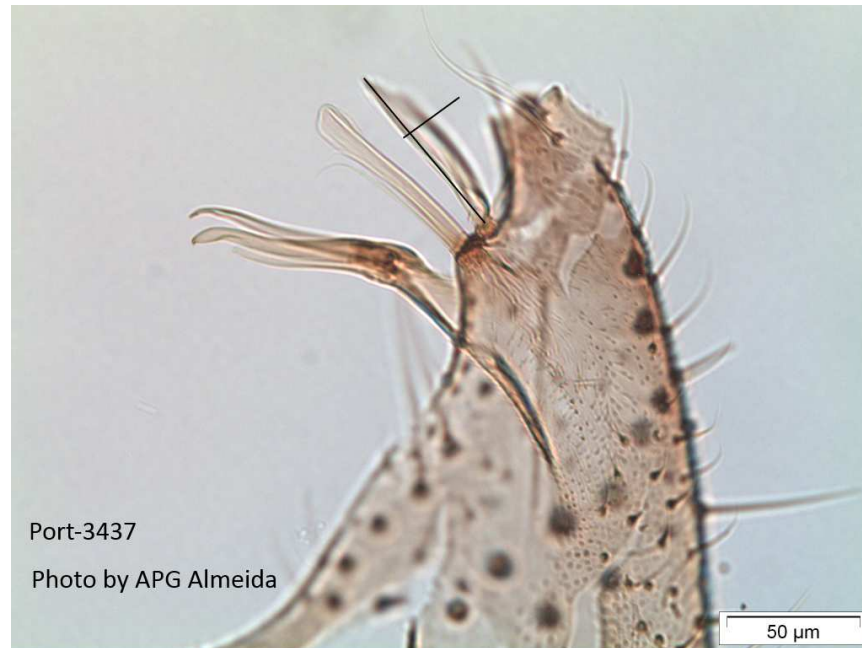

# Port-3437; Phallosome, X200

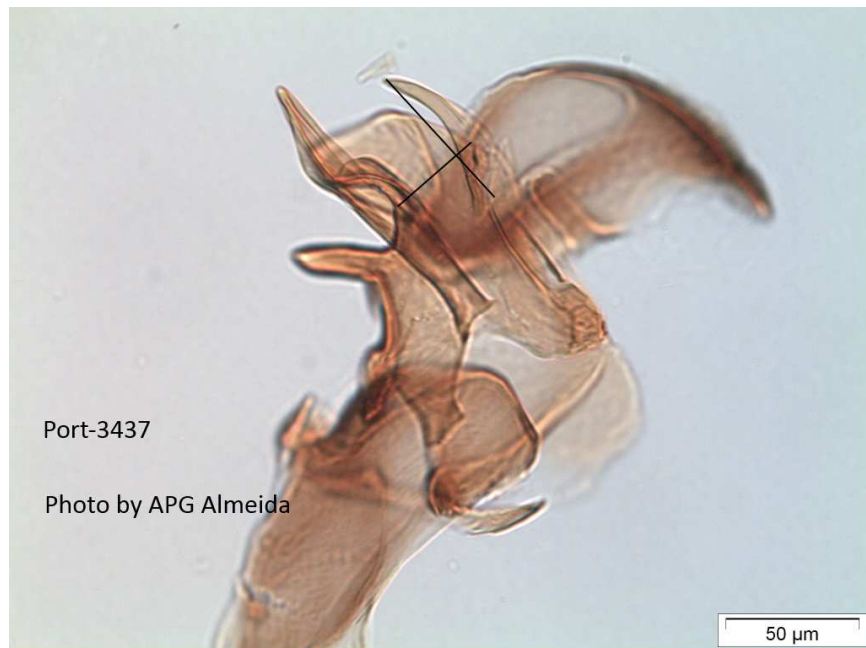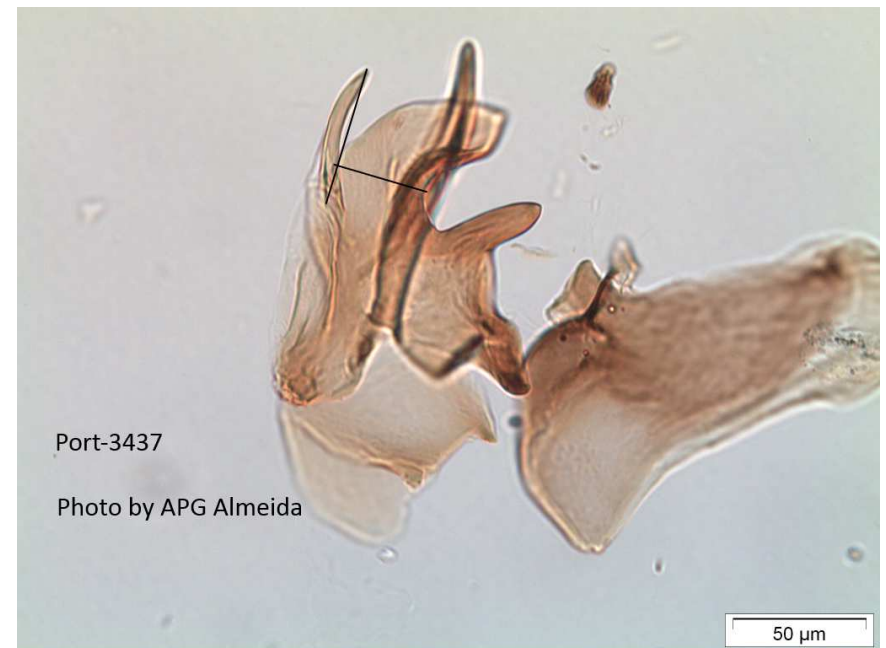

# Port-3438; Gonocoxite, X100

- 

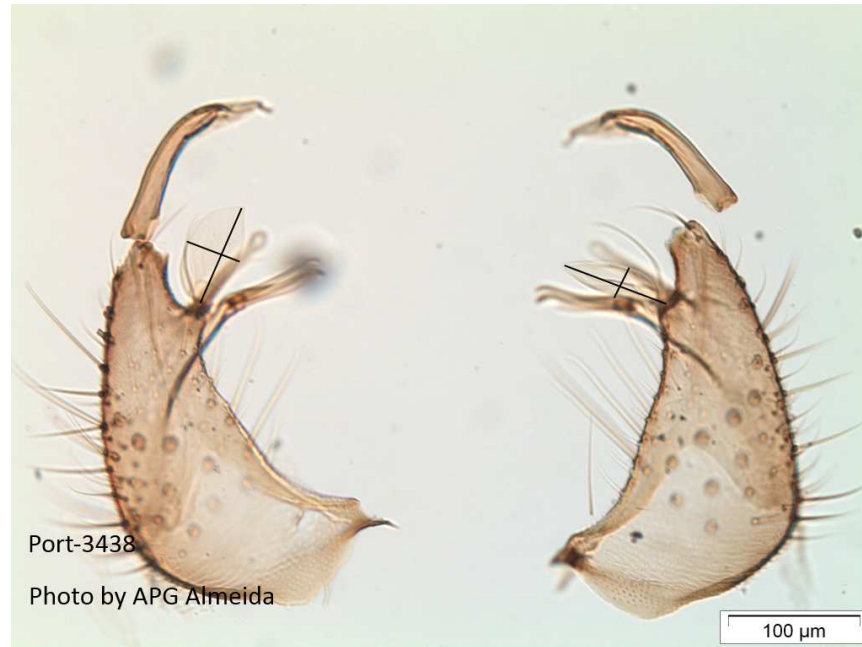

# Port-3438; Phallosome, X200

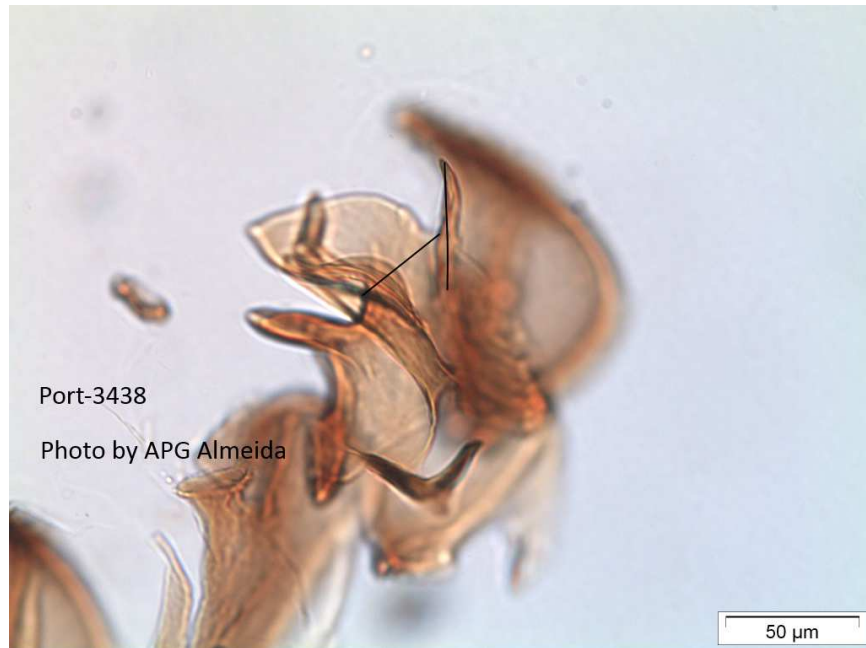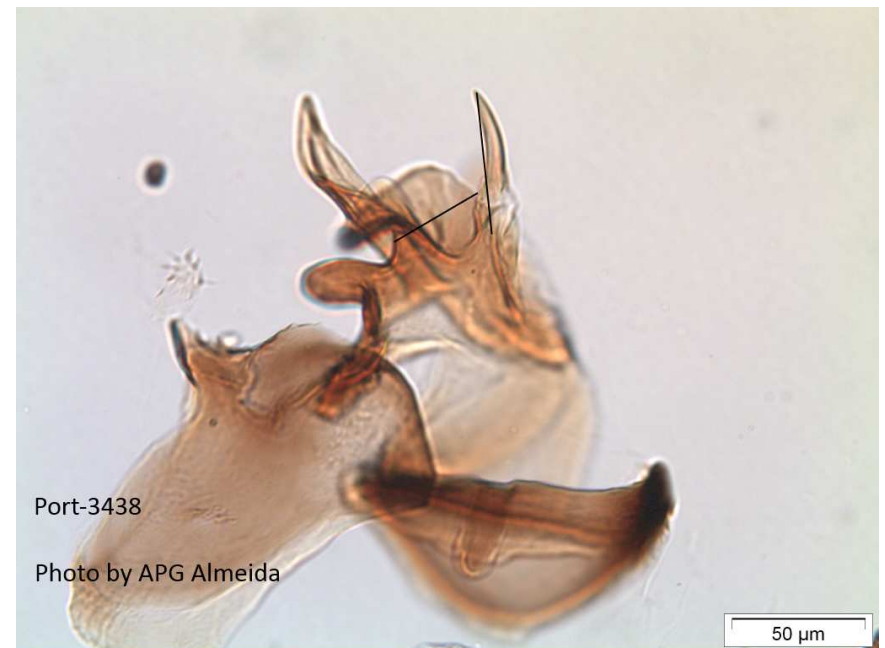



# Port-3439; Gonocoxite, X100

•

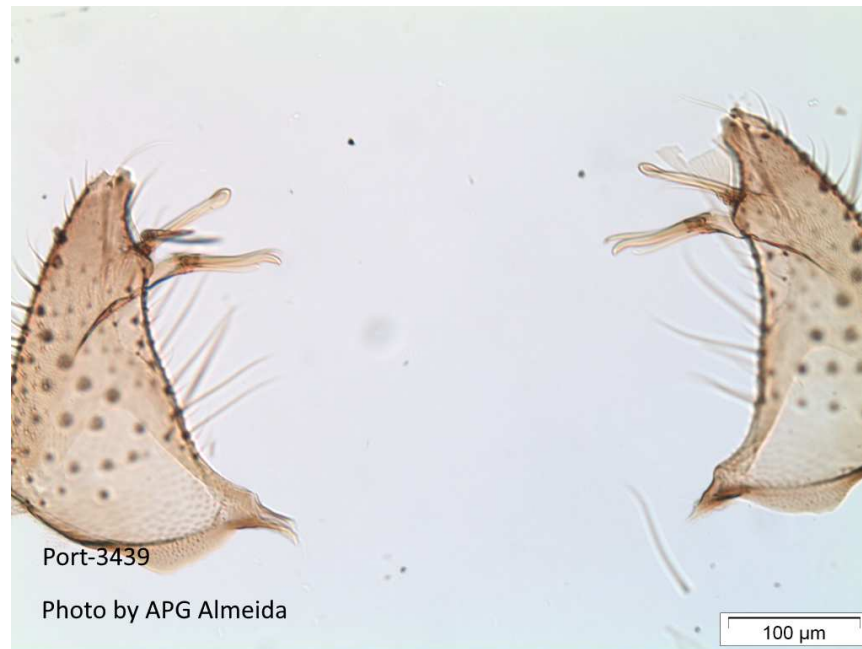

# Port-3439; Phallosome, X200

- 

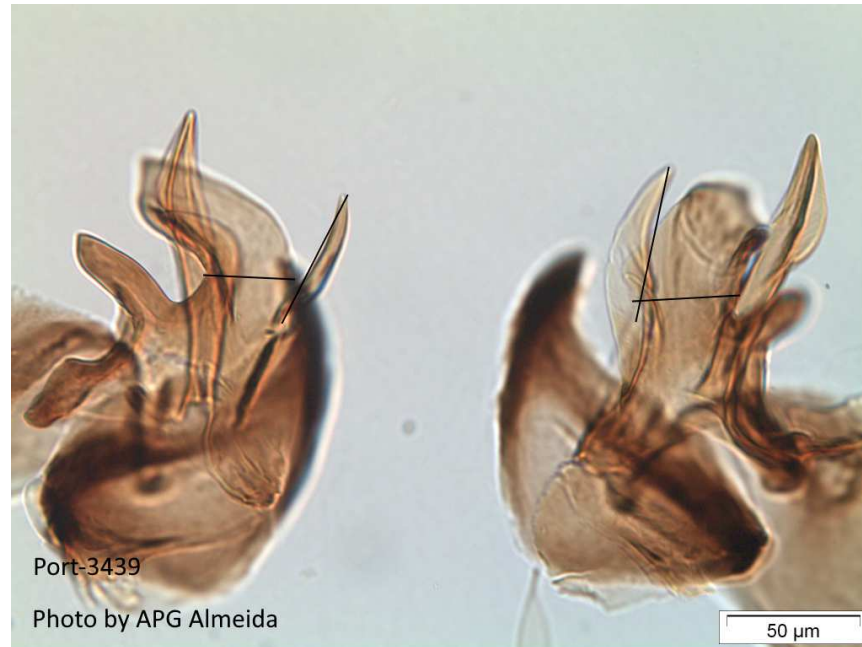

# SAfr-GAU86E1/GAU3; Gonocoxite, X100

- 

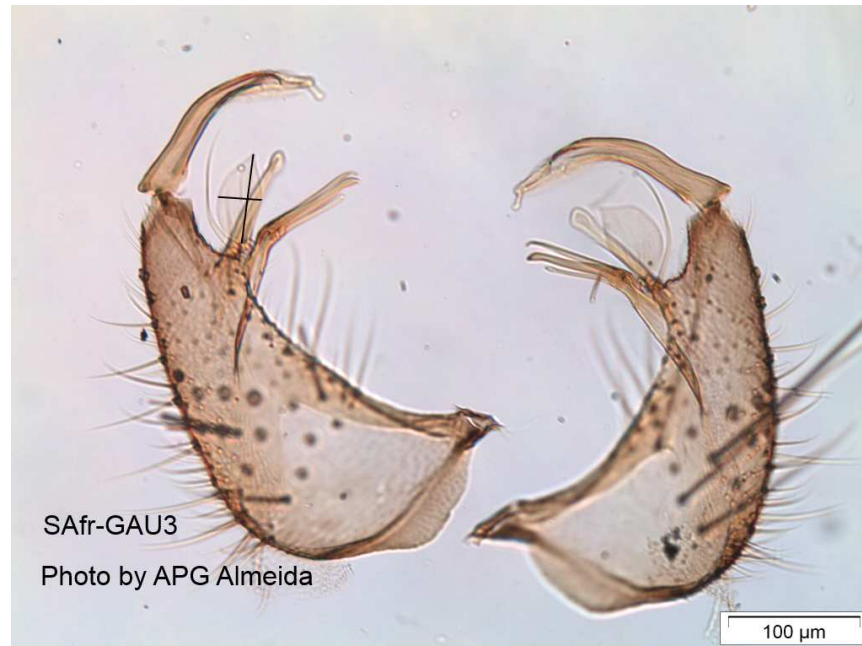

# SAfr-GAU86E1/GAU3; Phallosome, X200

- 

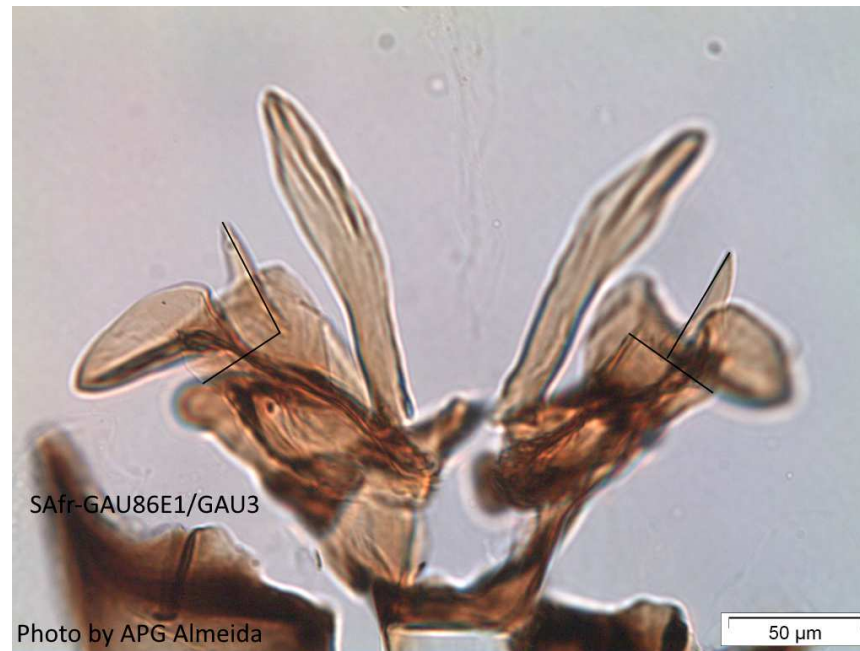

# SAfr-GAU86E1/GAU3; Phalosome, X200

- (remounted)

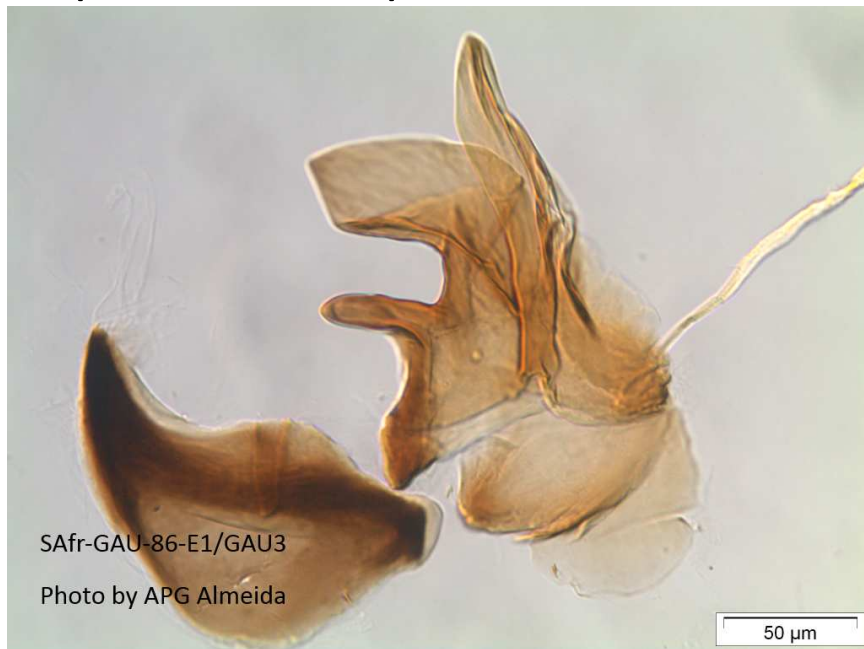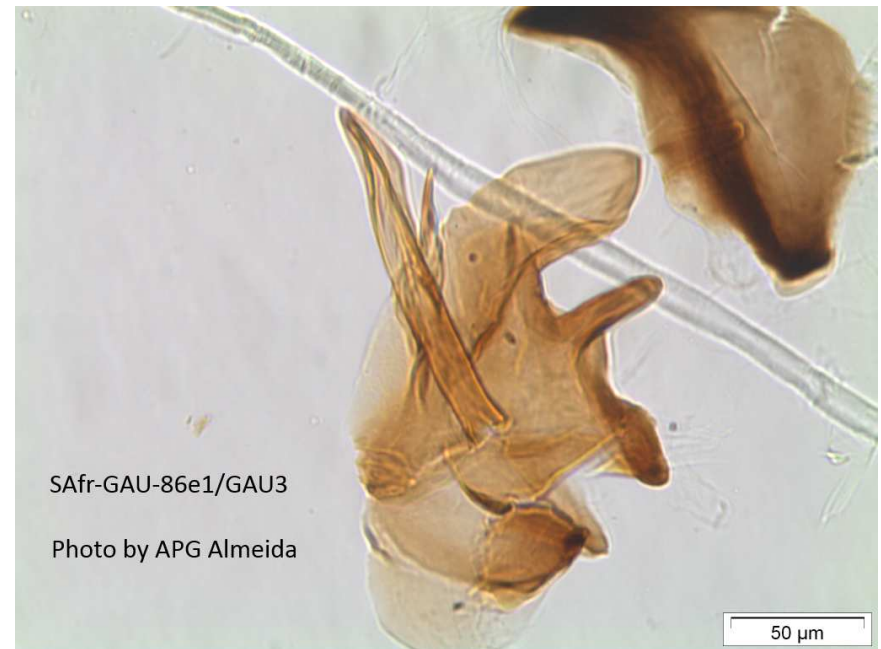

# SAfr-GAU86E2/GAU4; Gonocoxite, X100

- 1st mounting

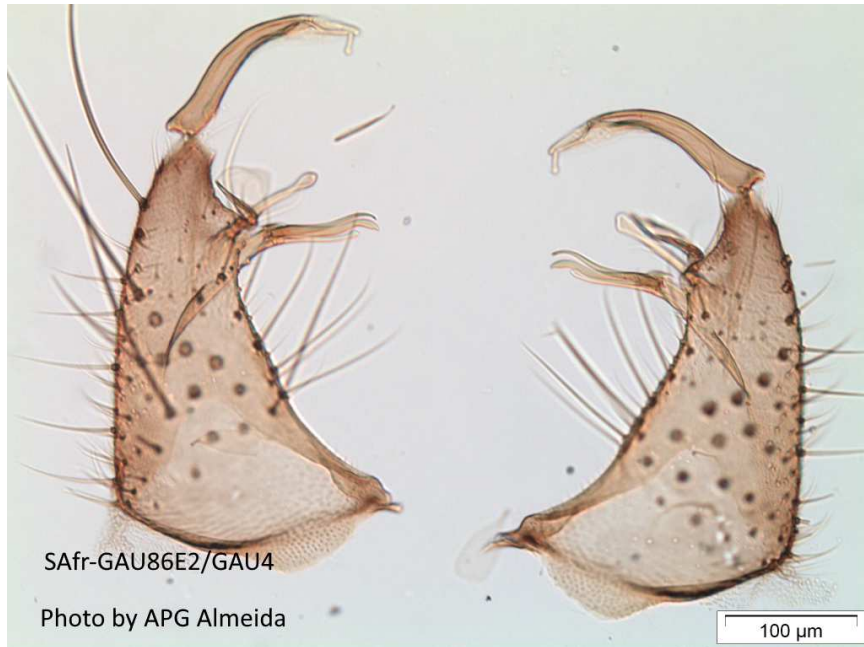

- 2nd mounting

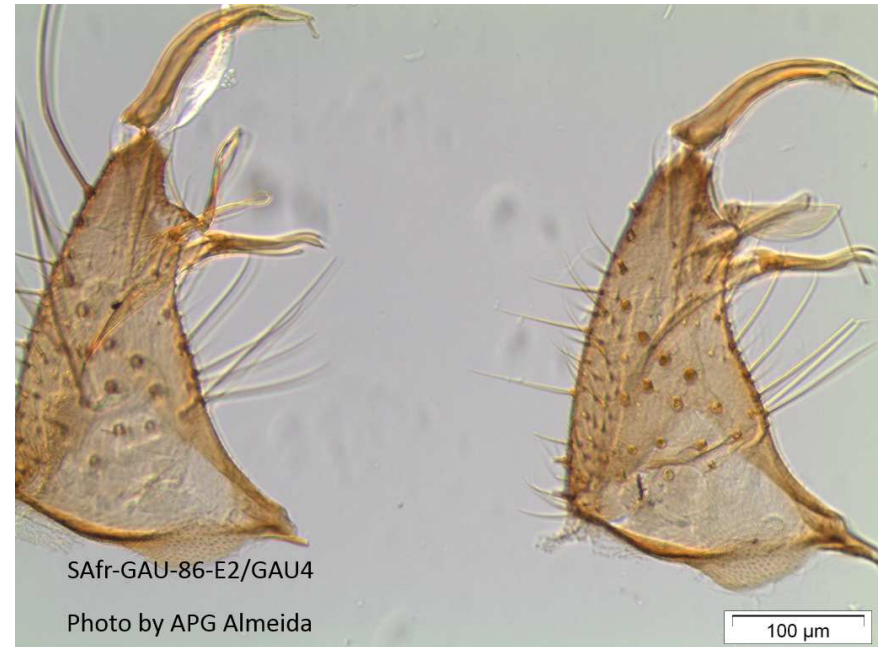

# SAfr-GAU86E2/GAU4; Phallosome, X200

•

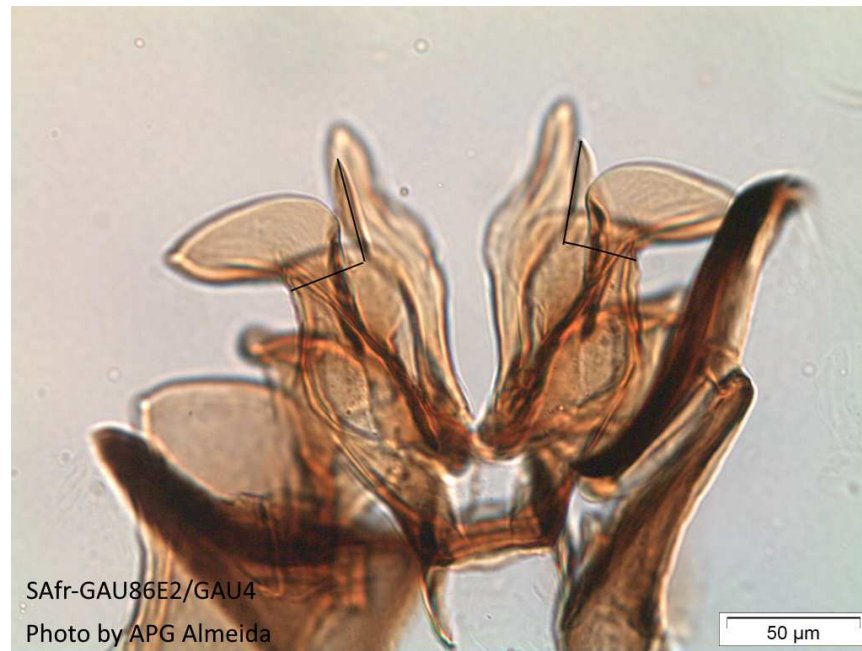

# SAfr-GAU86E2/GAU4; Phallosome, X200

- (remounted)

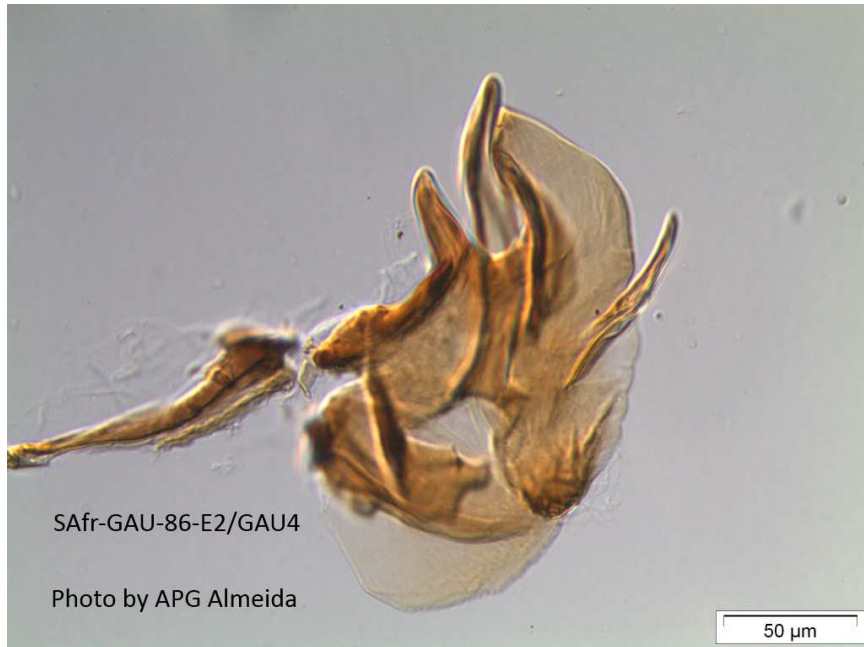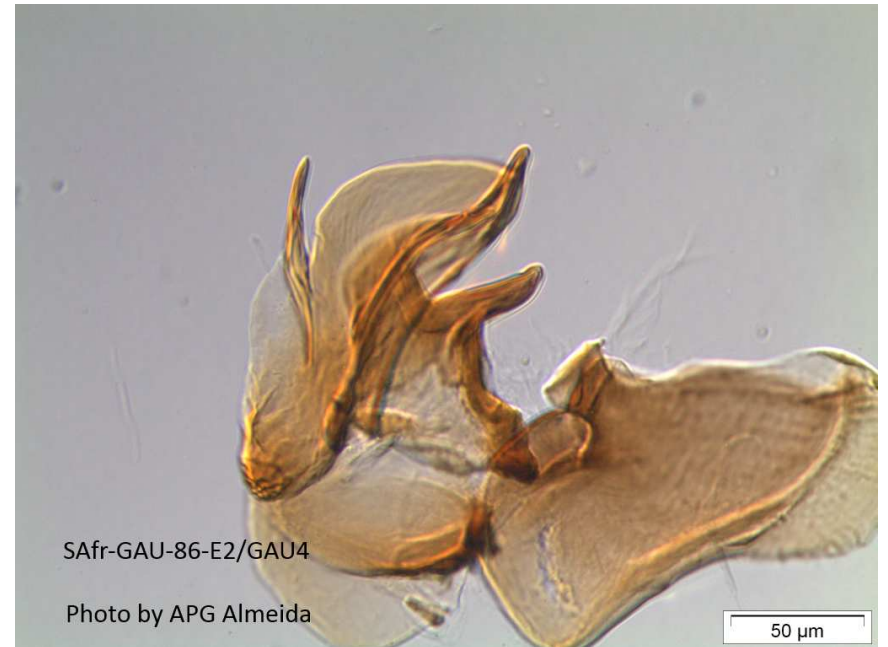



# SAfr-GAU109K/GAU9; Phallosome, X200

- (Gonocoxite has been lost)

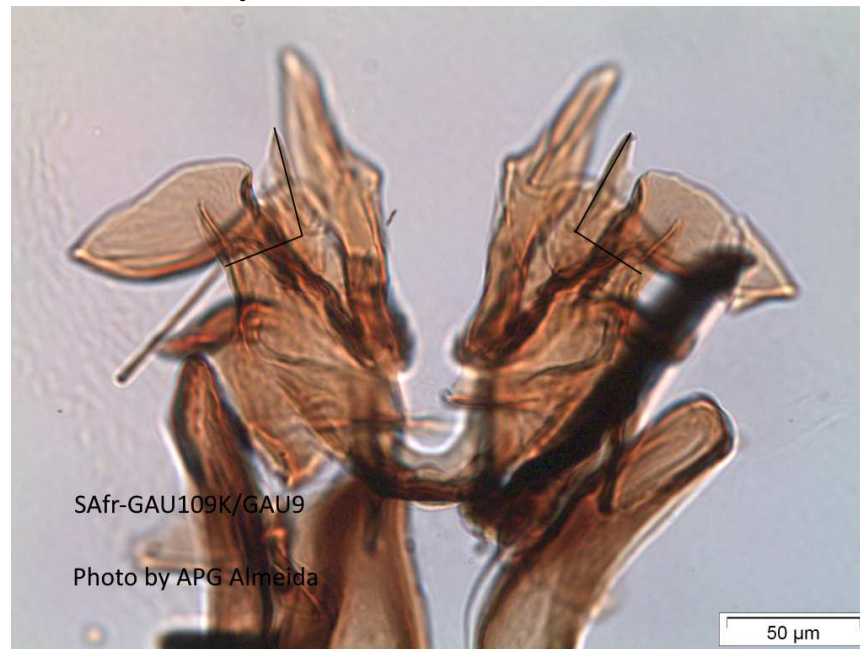

# SAfr-GAU109K/GAU9; Phallosome, X200

- (remounted)

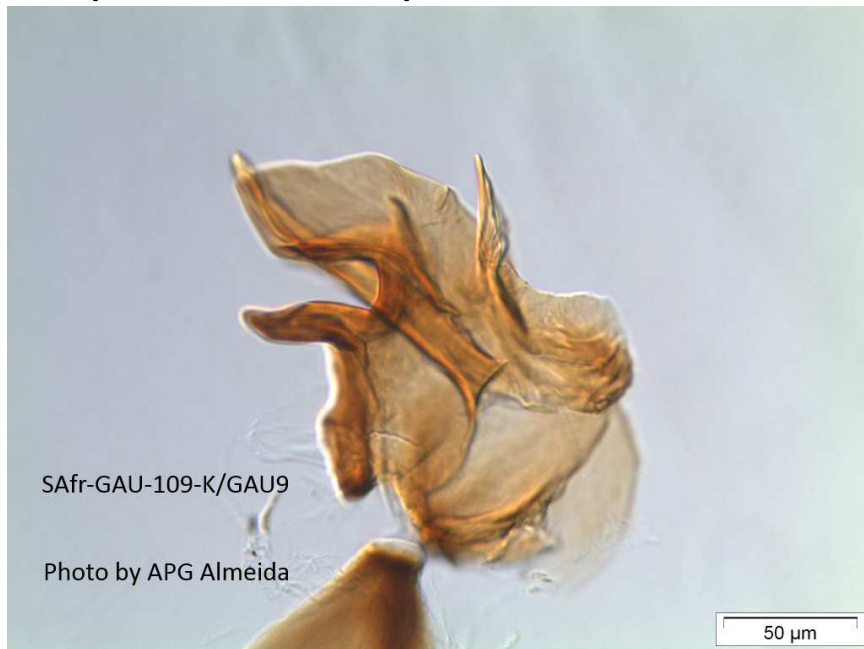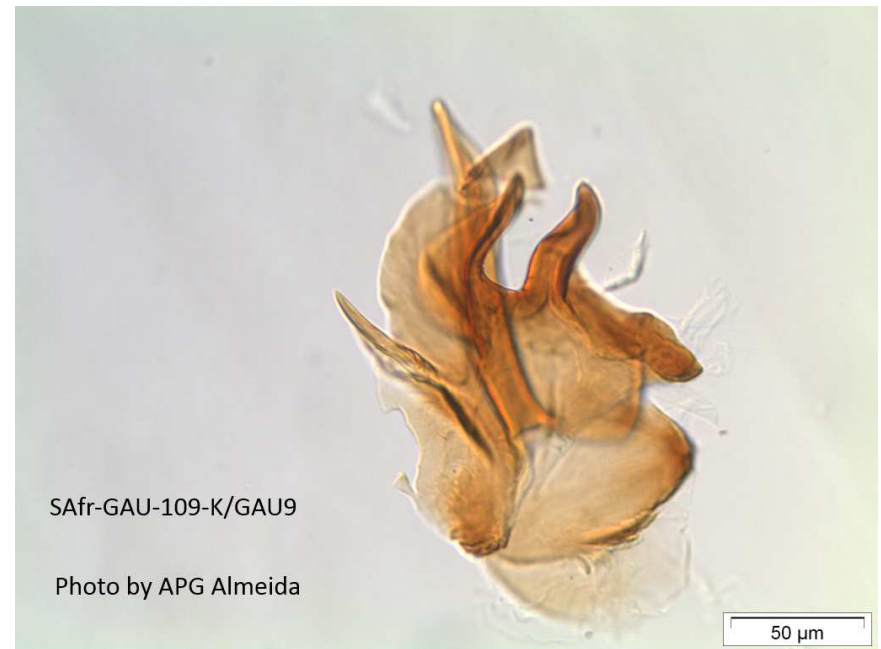

# SAfr-GAU113H/GAU10; Gonocoxite, X100

•

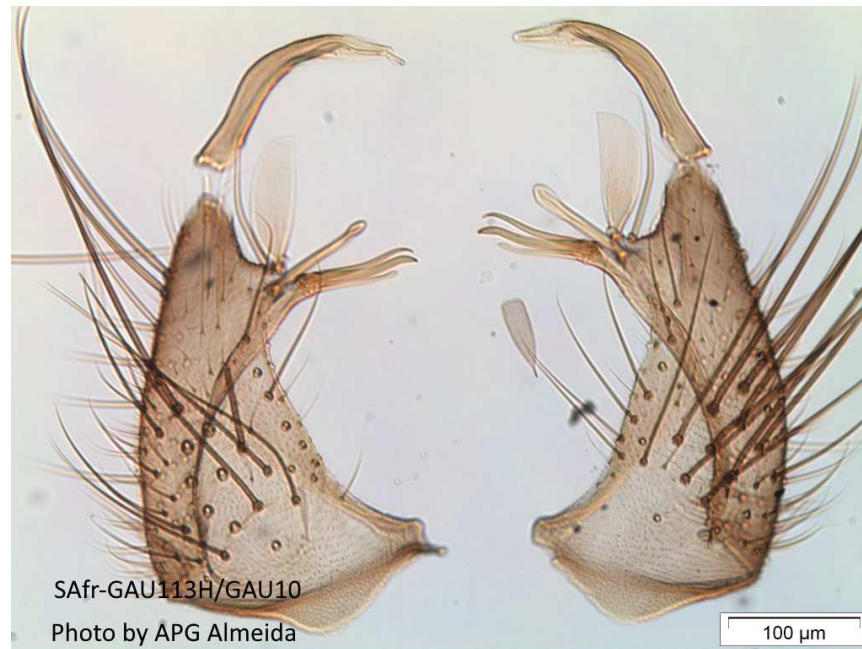

# SAfr-GAU113H/GAU10; Phallosome, X200

•

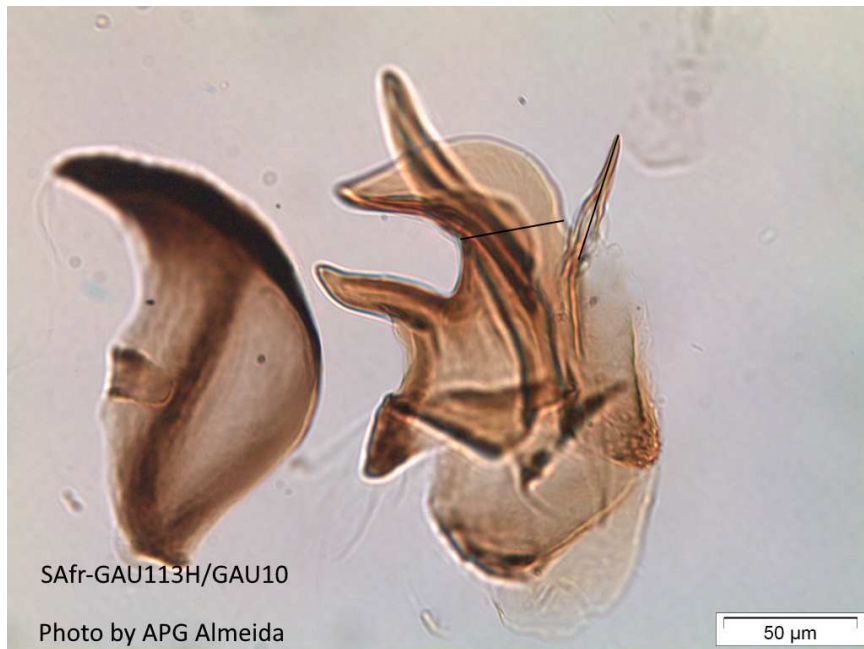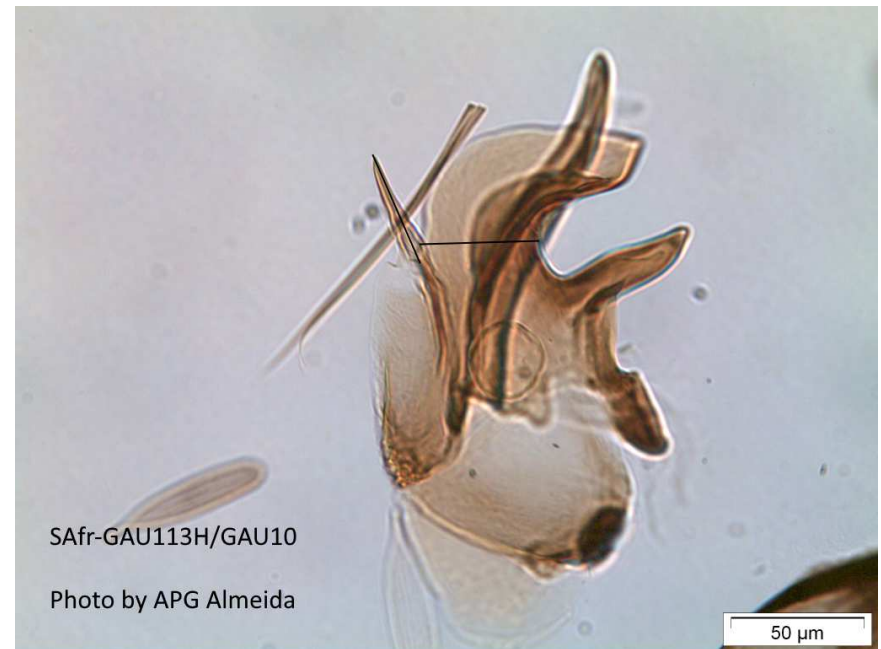

# SAfr-GAU118M/GAU12; Gonocoxite, X100

•

(X200)

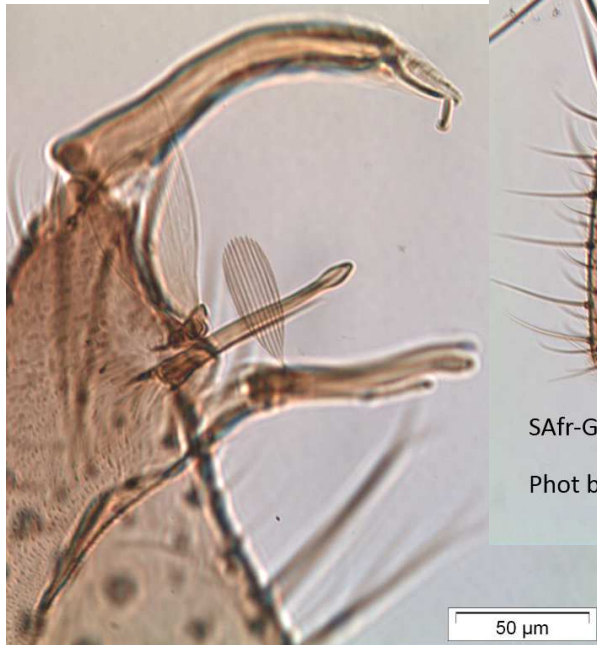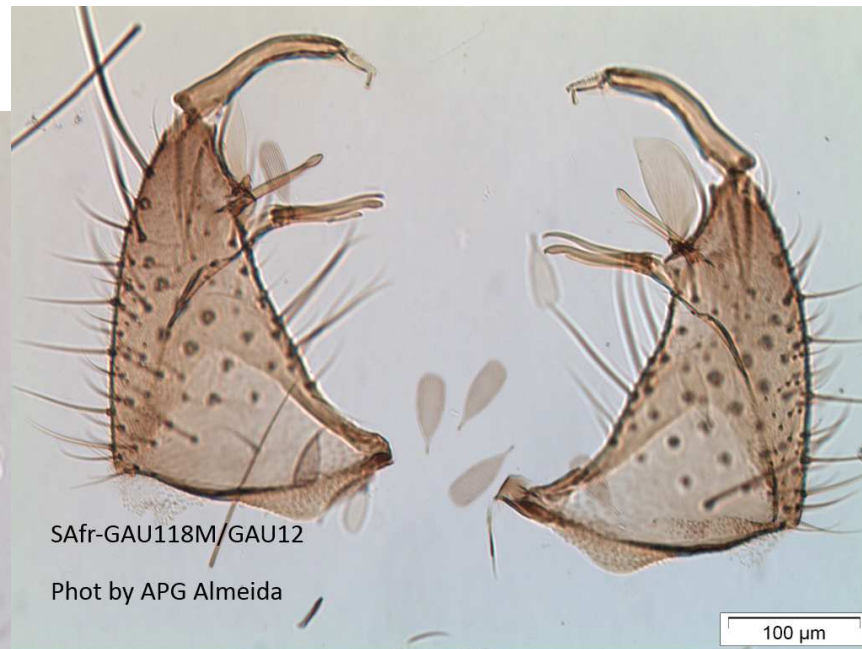

# SAfr-GAU118M/GAU12; Phallosome, X200

•

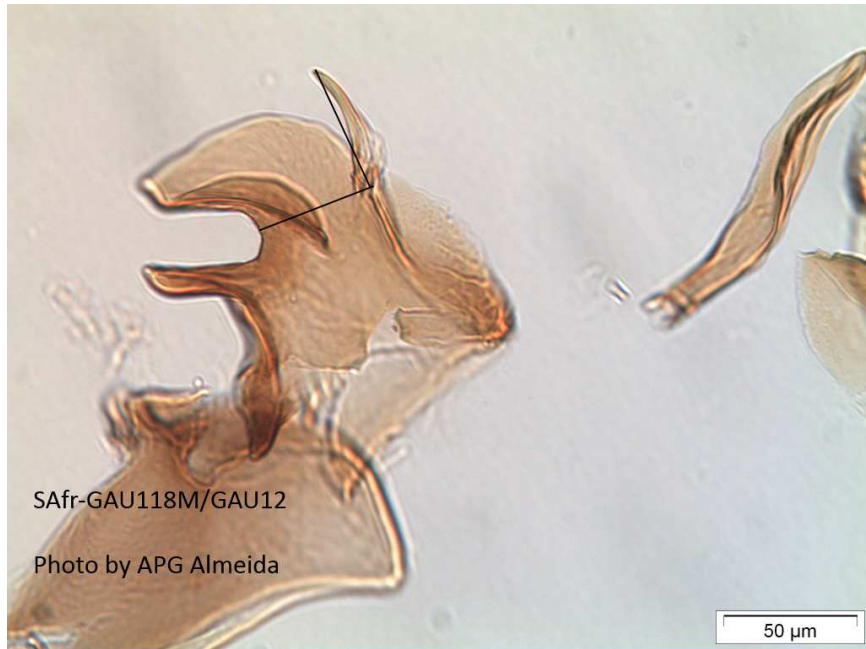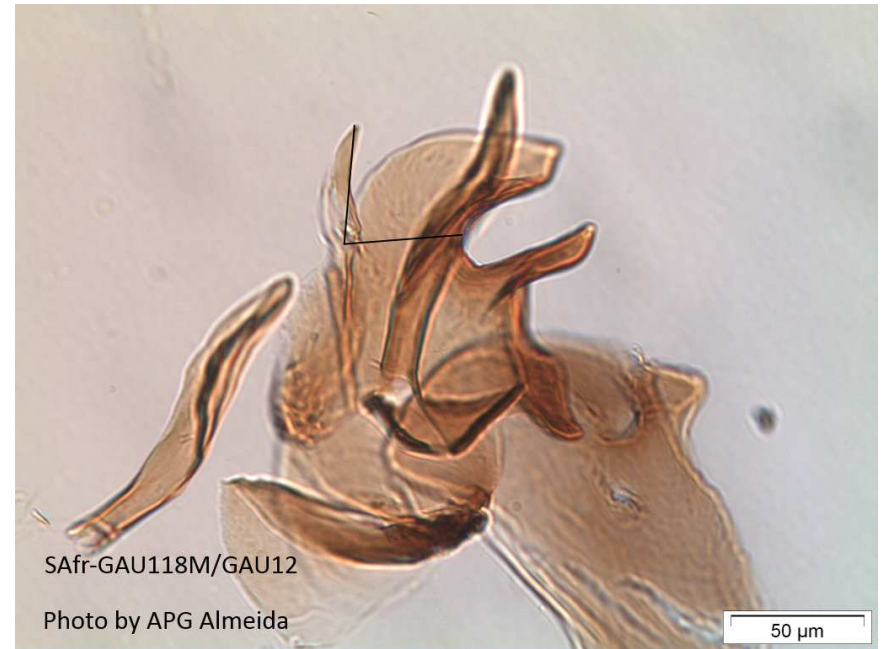

# SAfr-GAU122H/GAU13; Gonocoxite, X100

•

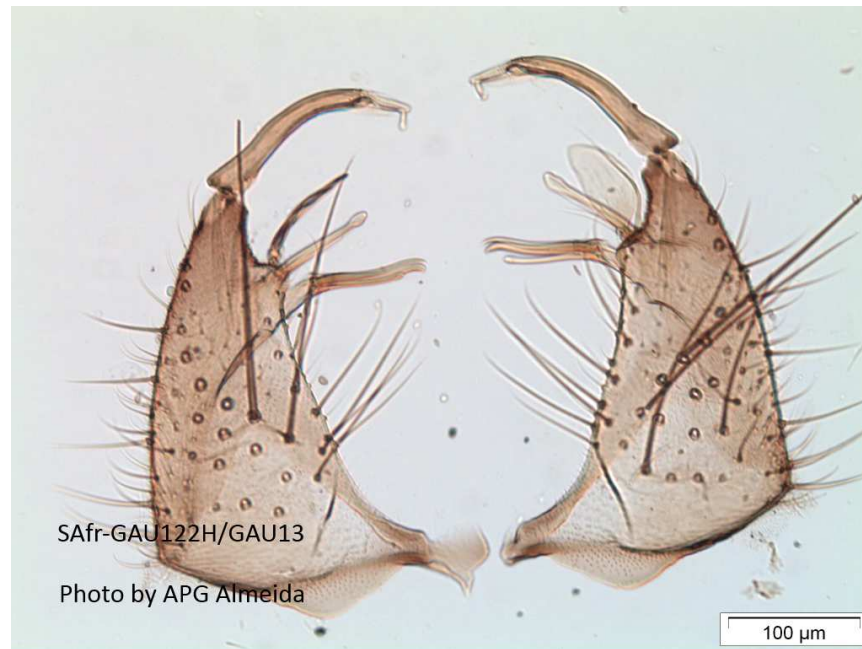

# SAfr-GAU122H/GAU13; Phallosome, X200

•

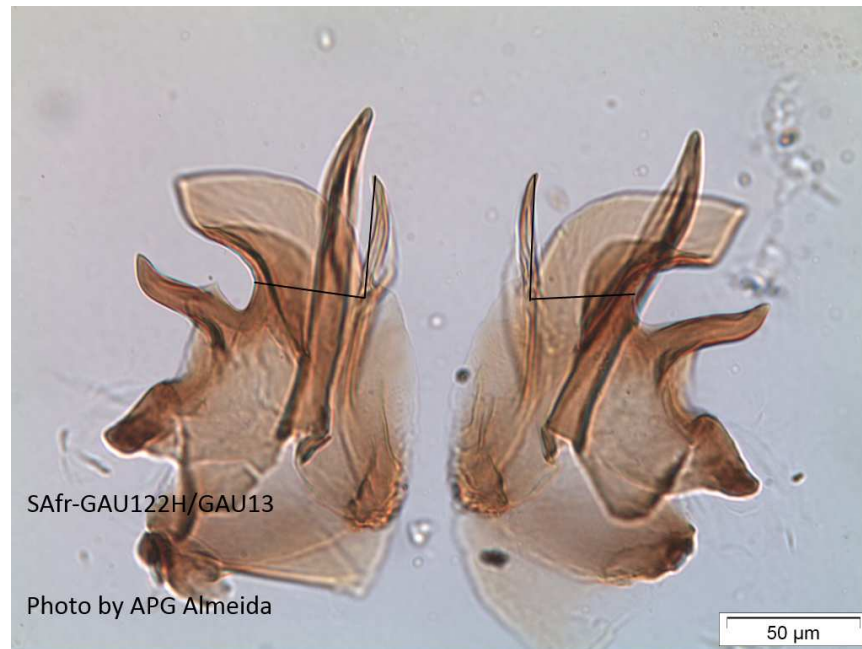



# SAfr-GAU-117w1; Gonocoxite, X100

•

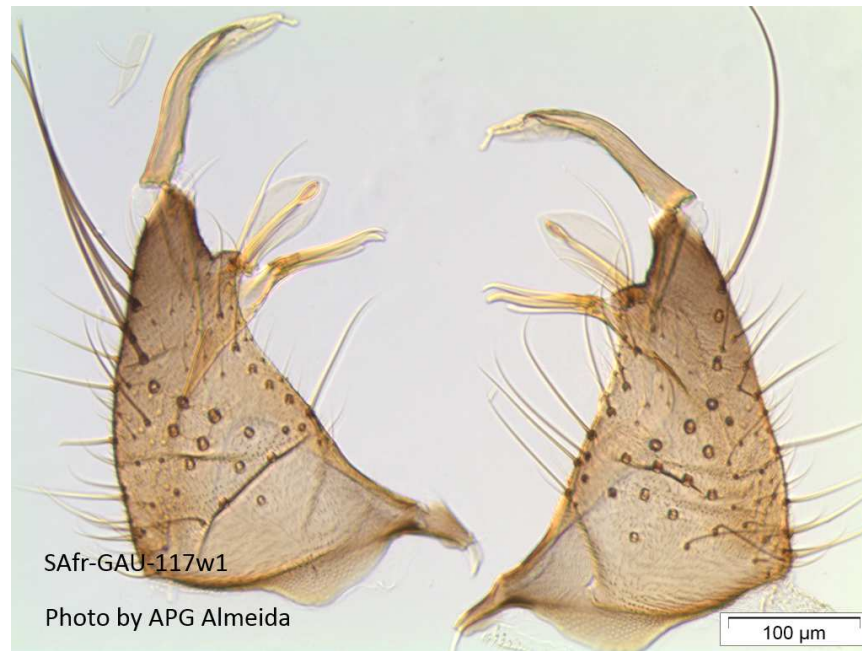

# SAfr-GAU117w1; Phallosome, X200

•

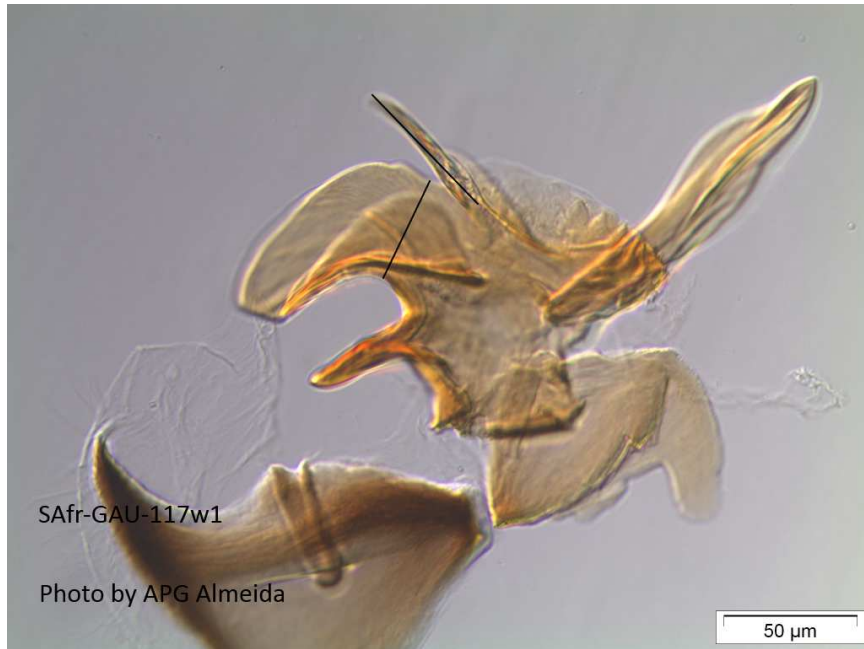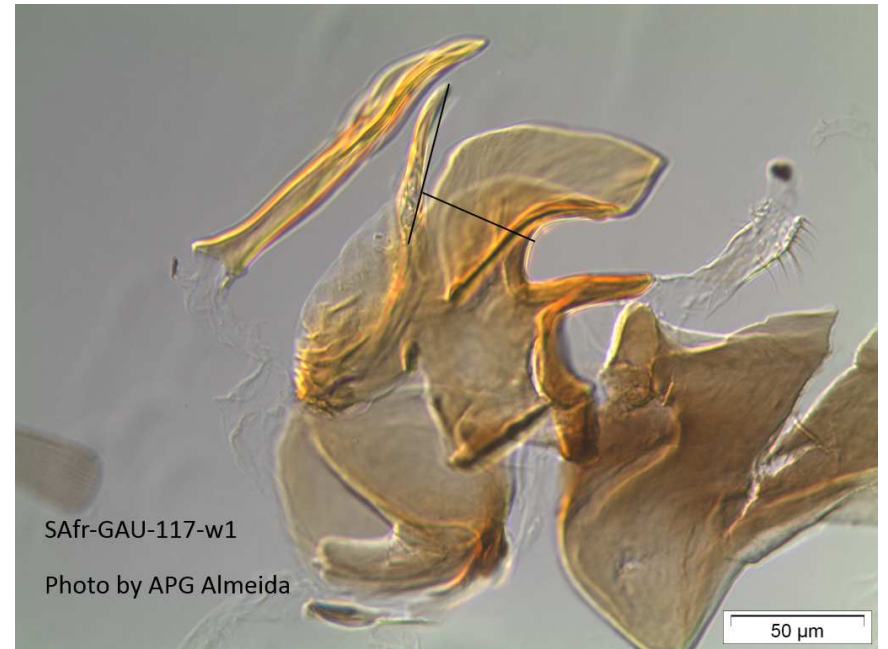

# SAfr-GAU-117w2; Gonocoxite, X100

- 

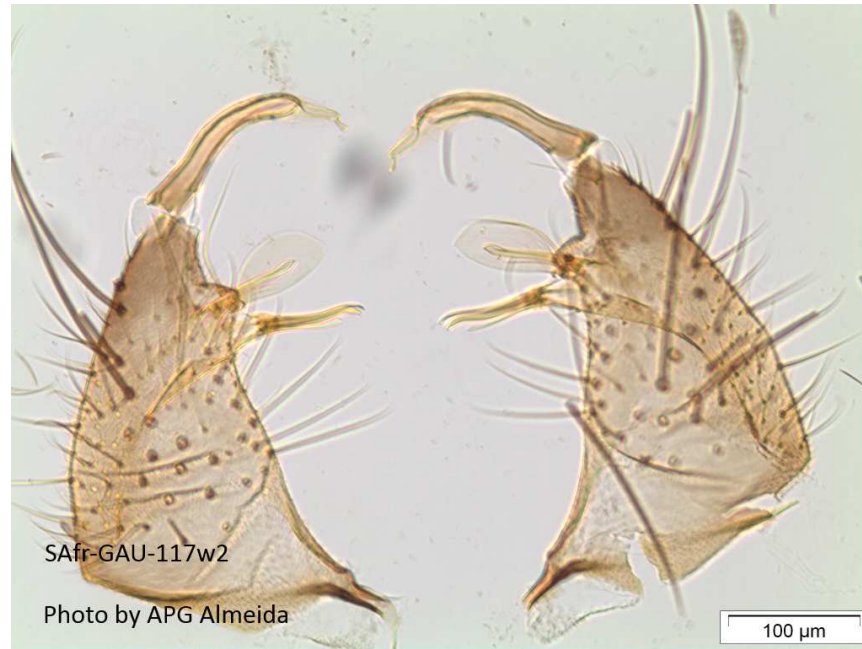

# SAfr-GAU-117w2; Phallosome, X200

•

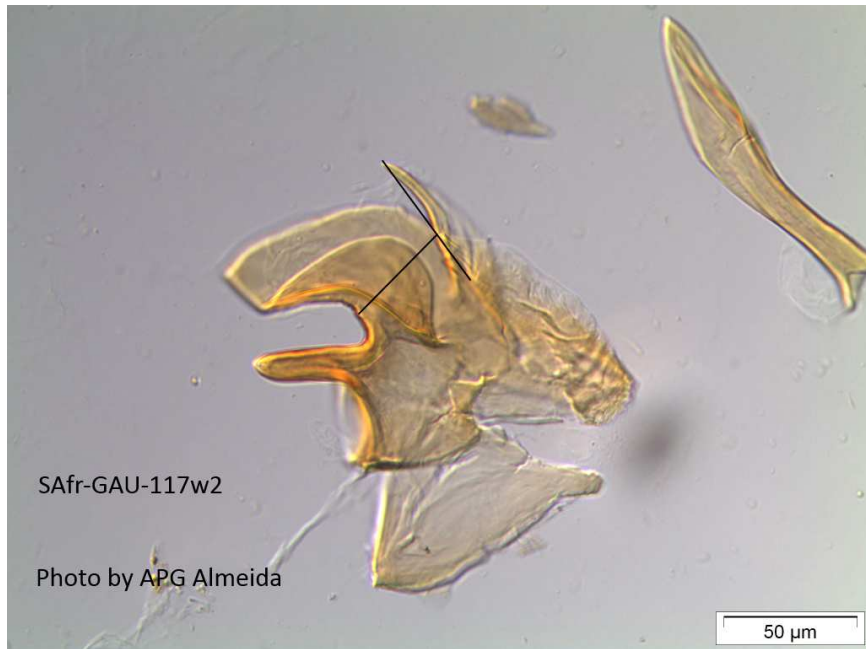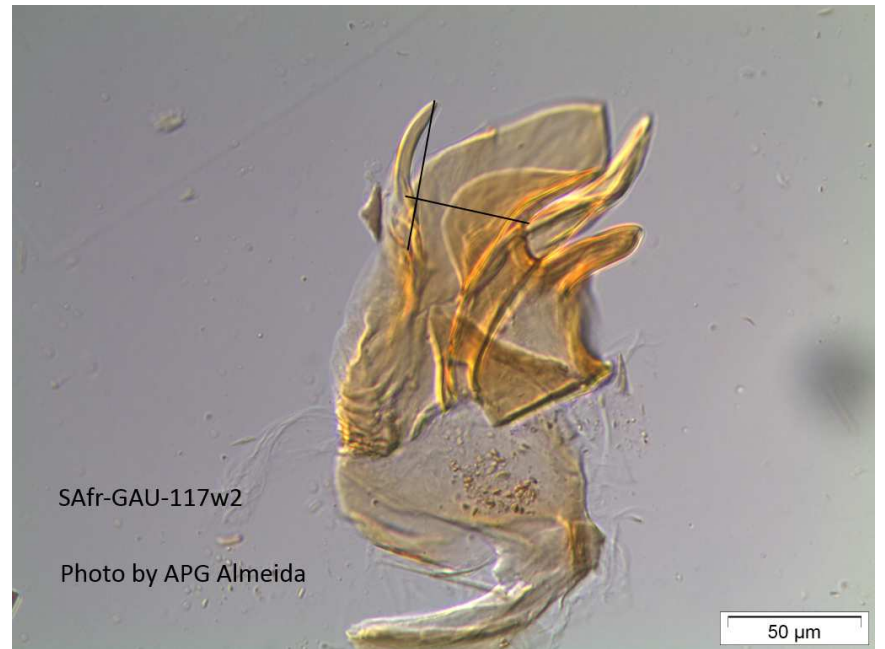

# SAfr-GAU-117w3; Gonocoxite, X100

•

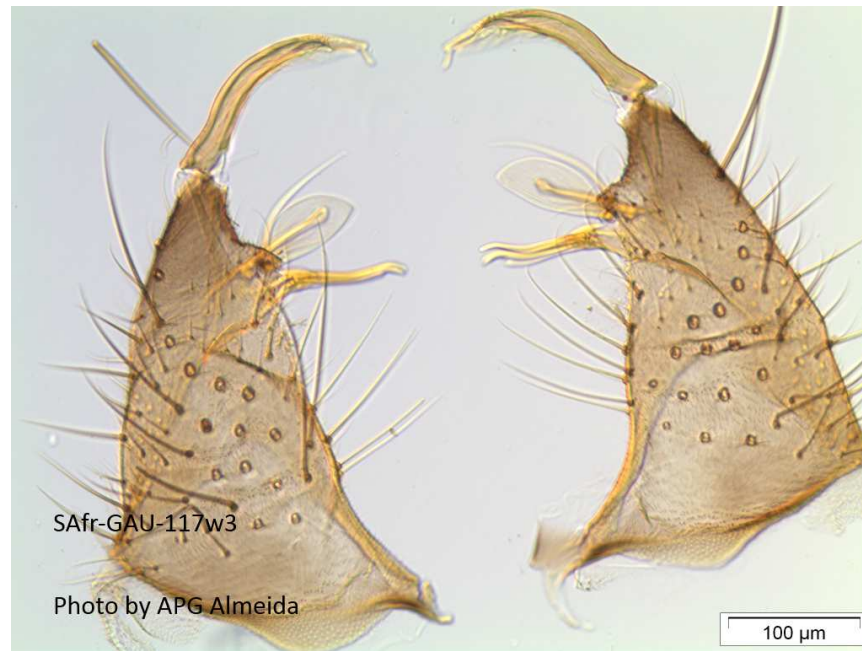

# SAfr-GAU-117w3; Phallosome, X200

•

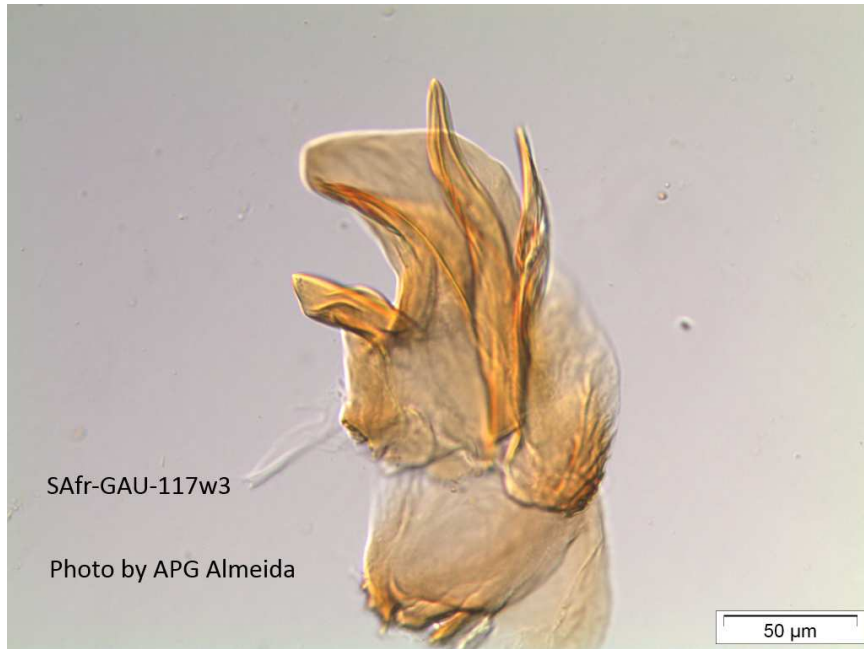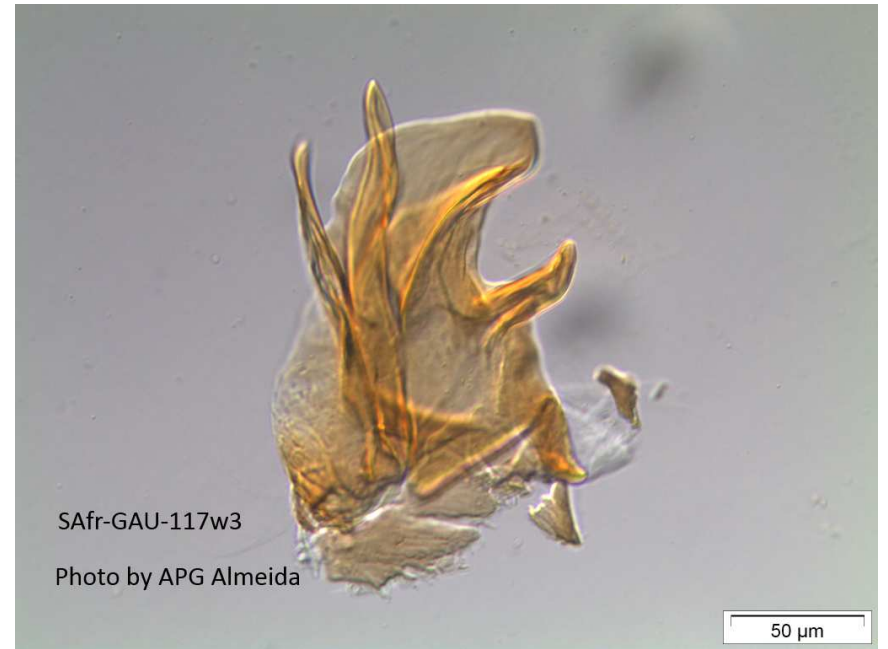

# SAfr-MAR-218i; Gonocoxite, X100

•

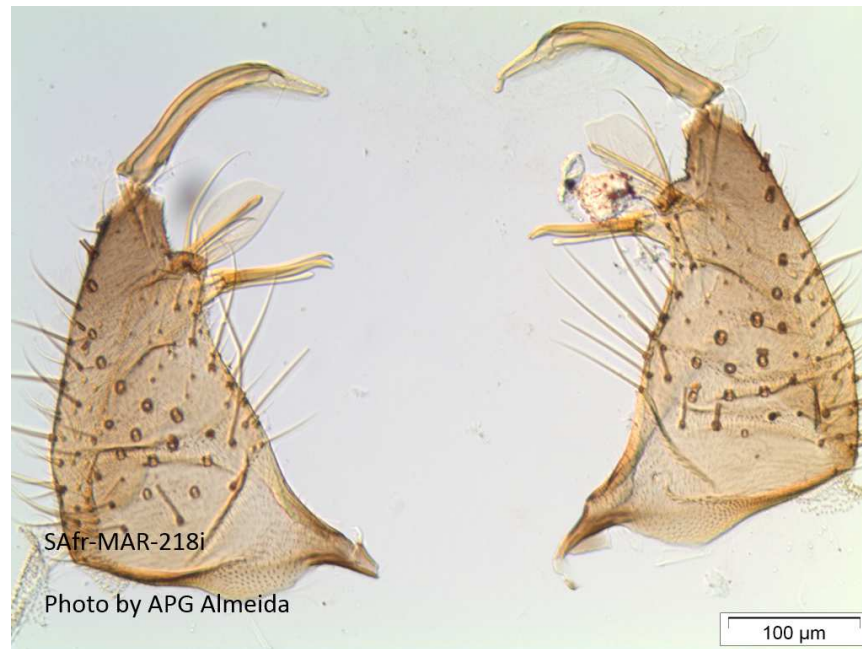

# SAfr-MAR-218i; Phallosome, X200

•

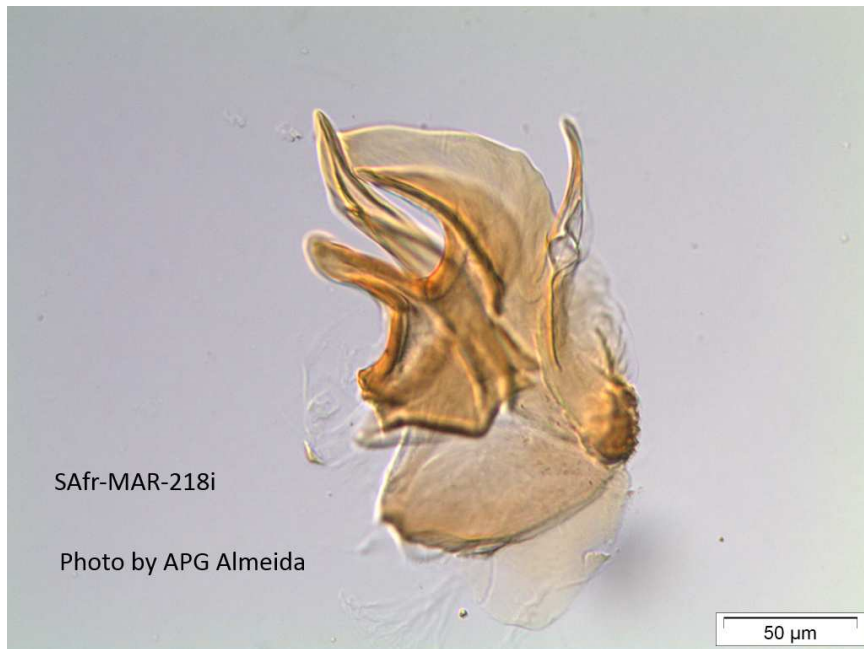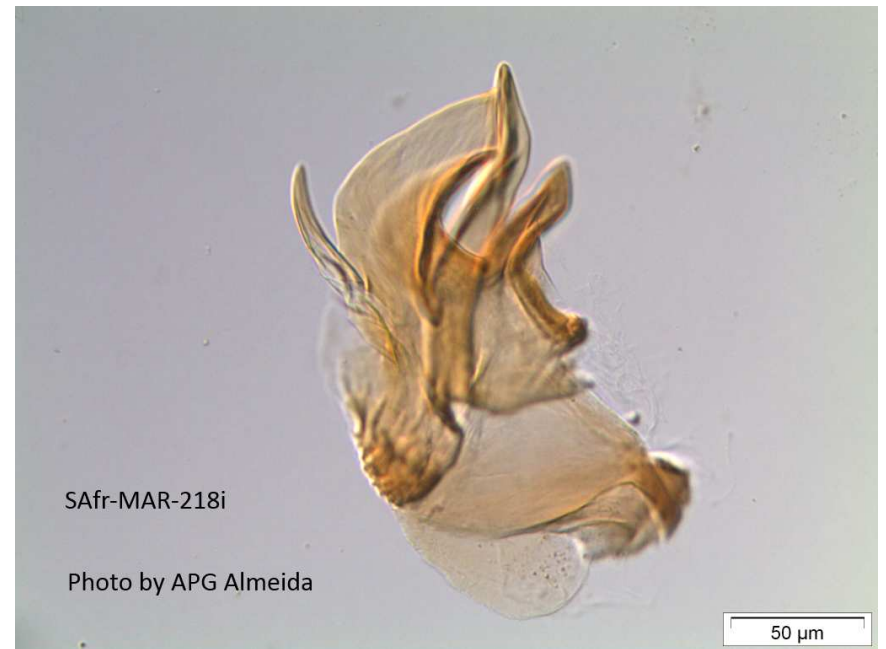



# SAfr-MAR-264k; Gonocoxite, X100

•

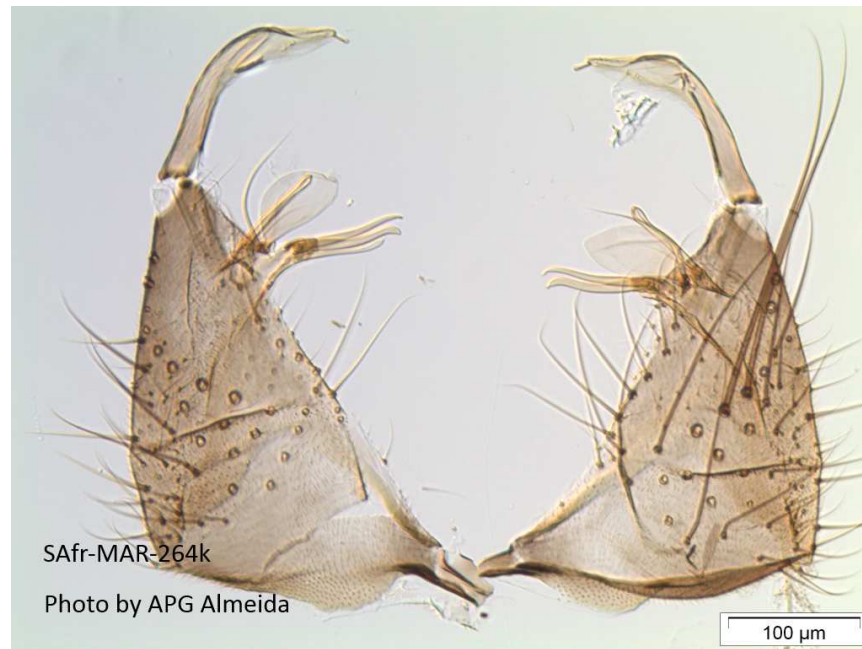

# SAfr-MAR-264k; Phalosome, X200

•

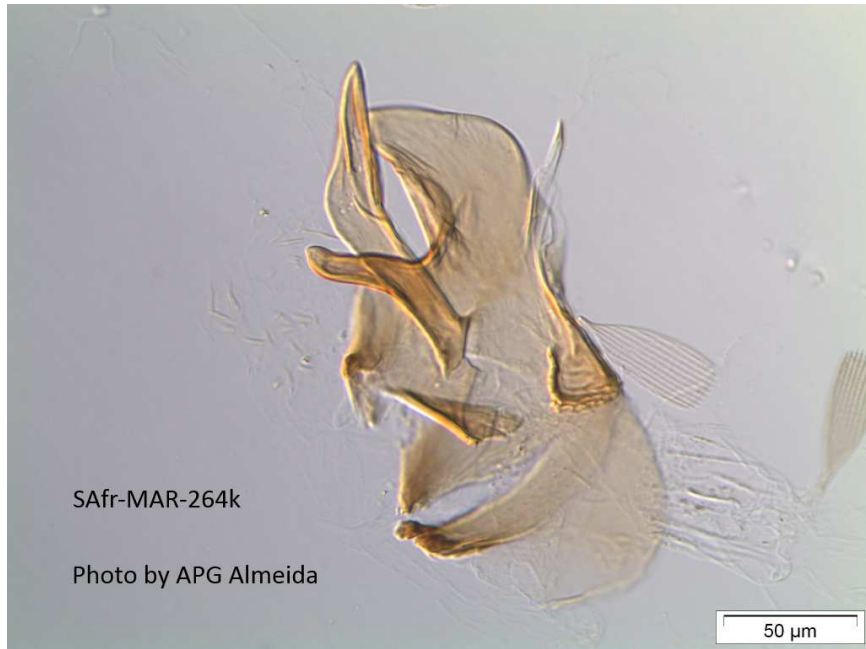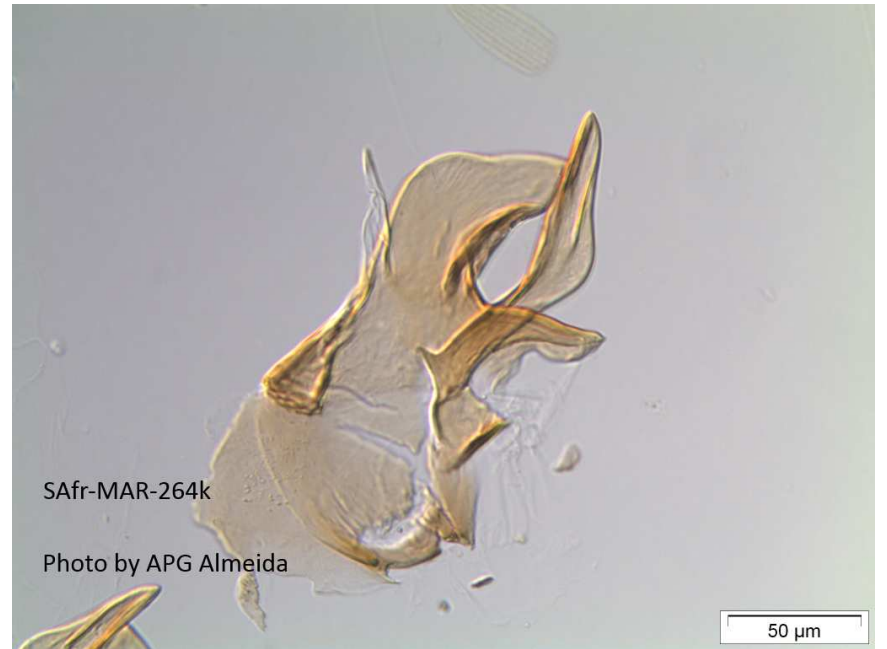

Supplement: 13071_2016_1877_MOESM4_ESM.pdf [file 13071_2016_1877_MOESM4_ESM.pdf]
