# Supplementary material for: Comparative morphological and molecular analysis confirms the presence of the West Nile virus mosquito vector, Culex univittatus, in the Iberian Peninsula
Source: PubMed Central journal article supplement (PMC5123335; doi:10.1186/s13071-016-1877-7), 2016-11-25

# BOLD Systems Identification results

# Similarity

## ➤ Specimen from Iberian Peninsula (Port-256)

Specimen Identification Request

Print

Query: 256Consensus Top Hit: Arthropoda - Diptera - Culex univittatus (98.01%)

**Search Result:**  
 A species level match could not be made. The nearest match is with *Culex univittatus*.

A species page is available for this taxon: [Species Page](#)

Closest matching BIN (within 3%): [BIN Page](#)

For a hierarchical placement - a neighbor-joining tree is provided: [Tree Based Identification](#)

---

**Identification Summary:**

| Taxonomic Level | Taxon Assignment | Probability of Placement (%) |
|-----------------|------------------|------------------------------|
| Phylum          | Arthropoda       | 100                          |
| Class           | Insecta          | 100                          |
| Order           | Diptera          | 100                          |
| Family          | Culicidae        | 100                          |
| Genus           | Culex            | 98                           |

**Similarity Scores of Top 99 Matches:**

**TOP 20 Matches:** Display option: [Top 20](#)

| Phylum     | Class   | Order   | Family    | Genus | Species            | Similarity (%) | Status        |
|------------|---------|---------|-----------|-------|--------------------|----------------|---------------|
| Arthropoda | Insecta | Diptera | Culicidae | Culex | <i>univittatus</i> | 98.01          | Early-Release |
| Arthropoda | Insecta | Diptera | Culicidae | Culex | <i>perexiguus</i>  | 96.48          | Private       |
| Arthropoda | Insecta | Diptera | Culicidae | Culex | <i>univittatus</i> | 96.33          | Private       |
| Arthropoda | Insecta | Diptera | Culicidae | Culex | <i>univittatus</i> | 96.33          | Private       |
| Arthropoda | Insecta | Diptera | Culicidae | Culex | <i>univittatus</i> | 96.33          | Private       |
| Arthropoda | Insecta | Diptera | Culicidae | Culex | <i>univittatus</i> | 96.33          | Private       |
| Arthropoda | Insecta | Diptera | Culicidae | Culex | <i>univittatus</i> | 96.33          | Private       |
| Arthropoda | Insecta | Diptera | Culicidae | Culex | <i>univittatus</i> | 96.33          | Private       |
| Arthropoda | Insecta | Diptera | Culicidae | Culex | <i>univittatus</i> | 96.33          | Private       |
| Arthropoda | Insecta | Diptera | Culicidae | Culex | <i>univittatus</i> | 96.33          | Private       |
| Arthropoda | Insecta | Diptera | Culicidae | Culex | <i>univittatus</i> | 96.33          | Private       |
| Arthropoda | Insecta | Diptera | Culicidae | Culex | <i>univittatus</i> | 96.33          | Private       |
| Arthropoda | Insecta | Diptera | Culicidae | Culex | <i>univittatus</i> | 96.33          | Private       |
| Arthropoda | Insecta | Diptera | Culicidae | Culex | <i>univittatus</i> | 96.33          | Private       |
| Arthropoda | Insecta | Diptera | Culicidae | Culex | <i>perexiguus</i>  | 96.33          | Private       |
| Arthropoda | Insecta | Diptera | Culicidae | Culex | <i>perexiguus</i>  | 96.33          | Private       |
| Arthropoda | Insecta | Diptera | Culicidae | Culex | <i>univittatus</i> | 96.22          | Private       |
| Arthropoda | Insecta | Diptera | Culicidae | Culex | <i>perexiguus</i>  | 96.18          | Private       |
| Arthropoda | Insecta | Diptera | Culicidae | Culex | <i>perexiguus</i>  | 96.18          | Private       |
| Arthropoda | Insecta | Diptera | Culicidae | Culex | <i>perexiguus</i>  | 96.18          | Private       |

**Sampling Sites For Top Hits (>98% Match):**



# Similarity

## ➤ Specimen from South Africa (GAU1)

Specimen Identification Request

Print

Query: GAU1Consensus

Top Hit: Arthropoda - Diptera - Culex univittatus (99.54%)

**Search Result:**

The submitted sequence has been matched to *Culex univittatus*. This identification is solid unless there is a very closely allied congeneric species that has not yet been analyzed. Such cases are rare.

A species page is available for this taxon: [Species Page](#)

Closest matching BIN (within 3%): [BIN Page](#)

For a hierarchical placement - a neighbor-joining tree is provided: [Tree Based Identification](#)

**Identification Summary:**

| Taxonomic Level | Taxon Assignment  | Probability of Placement (%) |
|-----------------|-------------------|------------------------------|
| Phylum          | Arthropoda        | 100                          |
| Class           | Insecta           | 100                          |
| Order           | Diptera           | 100                          |
| Family          | Culicidae         | 100                          |
| Genus           | Culex             | 100                          |
| Species         | Culex univittatus | 99.5                         |

**Similarity Scores of Top 99 Matches:**

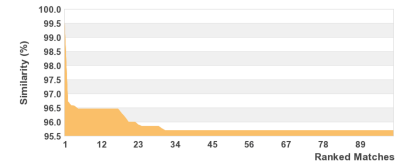

**TOP 20 Matches :**

Display option: [Top 20](#)

| Phylum     | Class   | Order   | Family    | Genus | Species            | Similarity (%) | Status        |
|------------|---------|---------|-----------|-------|--------------------|----------------|---------------|
| Arthropoda | Insecta | Diptera | Culicidae | Culex | <i>univittatus</i> | 99.54          | Early-Release |
| Arthropoda | Insecta | Diptera | Culicidae | Culex | <i>univittatus</i> | 96.74          | Private       |
| Arthropoda | Insecta | Diptera | Culicidae | Culex | <i>sp. KHH5</i>    | 96.58          | Early-Release |
| Arthropoda | Insecta | Diptera | Culicidae | Culex | <i>univittatus</i> | 96.57          | Private       |
| Arthropoda | Insecta | Diptera | Culicidae | Culex | <i>univittatus</i> | 96.47          | Private       |
| Arthropoda | Insecta | Diptera | Culicidae | Culex | <i>univittatus</i> | 96.47          | Private       |
| Arthropoda | Insecta | Diptera | Culicidae | Culex | <i>univittatus</i> | 96.47          | Private       |
| Arthropoda | Insecta | Diptera | Culicidae | Culex | <i>univittatus</i> | 96.47          | Private       |
| Arthropoda | Insecta | Diptera | Culicidae | Culex | <i>univittatus</i> | 96.47          | Private       |
| Arthropoda | Insecta | Diptera | Culicidae | Culex | <i>univittatus</i> | 96.47          | Private       |
| Arthropoda | Insecta | Diptera | Culicidae | Culex | <i>univittatus</i> | 96.47          | Private       |
| Arthropoda | Insecta | Diptera | Culicidae | Culex | <i>univittatus</i> | 96.47          | Private       |
| Arthropoda | Insecta | Diptera | Culicidae | Culex | <i>univittatus</i> | 96.47          | Private       |
| Arthropoda | Insecta | Diptera | Culicidae | Culex | <i>univittatus</i> | 96.47          | Private       |
| Arthropoda | Insecta | Diptera | Culicidae | Culex | <i>univittatus</i> | 96.47          | Private       |
| Arthropoda | Insecta | Diptera | Culicidae | Culex | <i>univittatus</i> | 96.47          | Private       |
| Arthropoda | Insecta | Diptera | Culicidae | Culex | <i>univittatus</i> | 96.47          | Private       |
| Arthropoda | Insecta | Diptera | Culicidae | Culex | <i>univittatus</i> | 96.47          | Private       |
| Arthropoda | Insecta | Diptera | Culicidae | Culex | <i>univittatus</i> | 96.47          | Private       |
| Arthropoda | Insecta | Diptera | Culicidae | Culex | <i>univittatus</i> | 96.47          | Private       |
| Arthropoda | Insecta | Diptera | Culicidae | Culex | <i>univittatus</i> | 96.47          | Private       |
| Arthropoda | Insecta | Diptera | Culicidae | Culex | <i>univittatus</i> | 96.31          | Private       |
| Arthropoda | Insecta | Diptera | Culicidae | Culex | <i>univittatus</i> | 96.17          | Private       |
| Arthropoda | Insecta | Diptera | Culicidae | Culex | <i>peroxiguus</i>  | 96.01          | Private       |

**Sampling Sites For Top Hits (>98% Match):**

# Similarity

➤ Specimen from Turkey (accession number: KJ012109.1)

Specimen Identification Request

Print

Query: gi|58694661|gb|KJ012109.1 | Top Hit: Arthropoda - Diptera - Culex perexiguus (100%)

**Search Result:**

The submitted sequence has been matched to *Culex perexiguus*. This identification is solid unless there is a very closely allied congeneric species that has not yet been analyzed. Such cases are rare.

A species page is available for this taxon: [Species Page](#)

Closest matching BIN (within 3%): [BIN Page](#)

For a hierarchical placement - a neighbor-joining tree is provided: [Tree Based Identification](#)

---

**Identification Summary:**

| Taxonomic Level | Taxon Assignment | Probability of Placement (%) |
|-----------------|------------------|------------------------------|
| Phylum          | Arthropoda       | 100                          |
| Class           | Insecta          | 100                          |
| Order           | Diptera          | 100                          |
| Family          | Culicidae        | 100                          |
| Genus           | Culex            | 100                          |
| Species         | Culex perexiguus | 100                          |

**Similarity Scores of Top 99 Matches:**

**TOP 20 Matches :** Display option: [Top 20](#)

| Phylum     | Class   | Order   | Family    | Genus | Species           | Similarity (%) | Status  |
|------------|---------|---------|-----------|-------|-------------------|----------------|---------|
| Arthropoda | Insecta | Diptera | Culicidae | Culex | <i>perexiguus</i> | 100            | Private |
| Arthropoda | Insecta | Diptera | Culicidae | Culex | <i>perexiguus</i> | 100            | Private |
| Arthropoda | Insecta | Diptera | Culicidae | Culex | <i>perexiguus</i> | 100            | Private |
| Arthropoda | Insecta | Diptera | Culicidae | Culex | <i>perexiguus</i> | 100            | Private |
| Arthropoda | Insecta | Diptera | Culicidae | Culex | <i>perexiguus</i> | 100            | Private |
| Arthropoda | Insecta | Diptera | Culicidae | Culex | <i>perexiguus</i> | 100            | Private |
| Arthropoda | Insecta | Diptera | Culicidae | Culex | <i>perexiguus</i> | 100            | Private |
| Arthropoda | Insecta | Diptera | Culicidae | Culex | <i>perexiguus</i> | 100            | Private |
| Arthropoda | Insecta | Diptera | Culicidae | Culex | <i>perexiguus</i> | 100            | Private |
| Arthropoda | Insecta | Diptera | Culicidae | Culex | <i>perexiguus</i> | 100            | Private |
| Arthropoda | Insecta | Diptera | Culicidae | Culex | <i>perexiguus</i> | 100            | Private |
| Arthropoda | Insecta | Diptera | Culicidae | Culex | <i>perexiguus</i> | 100            | Private |
| Arthropoda | Insecta | Diptera | Culicidae | Culex | <i>perexiguus</i> | 100            | Private |
| Arthropoda | Insecta | Diptera | Culicidae | Culex | <i>perexiguus</i> | 100            | Private |
| Arthropoda | Insecta | Diptera | Culicidae | Culex | <i>perexiguus</i> | 100            | Private |
| Arthropoda | Insecta | Diptera | Culicidae | Culex | <i>perexiguus</i> | 100            | Private |
| Arthropoda | Insecta | Diptera | Culicidae | Culex | <i>perexiguus</i> | 100            | Private |
| Arthropoda | Insecta | Diptera | Culicidae | Culex | <i>perexiguus</i> | 100            | Private |
| Arthropoda | Insecta | Diptera | Culicidae | Culex | <i>perexiguus</i> | 100            | Private |
| Arthropoda | Insecta | Diptera | Culicidae | Culex | <i>perexiguus</i> | 100            | Private |
| Arthropoda | Insecta | Diptera | Culicidae | Culex | <i>perexiguus</i> | 100            | Private |

**Sampling Sites For Top Hits (>98% Match):**

# Phylogenetic tree

➤ Specimen from Iberian Peninsula (Port-256)

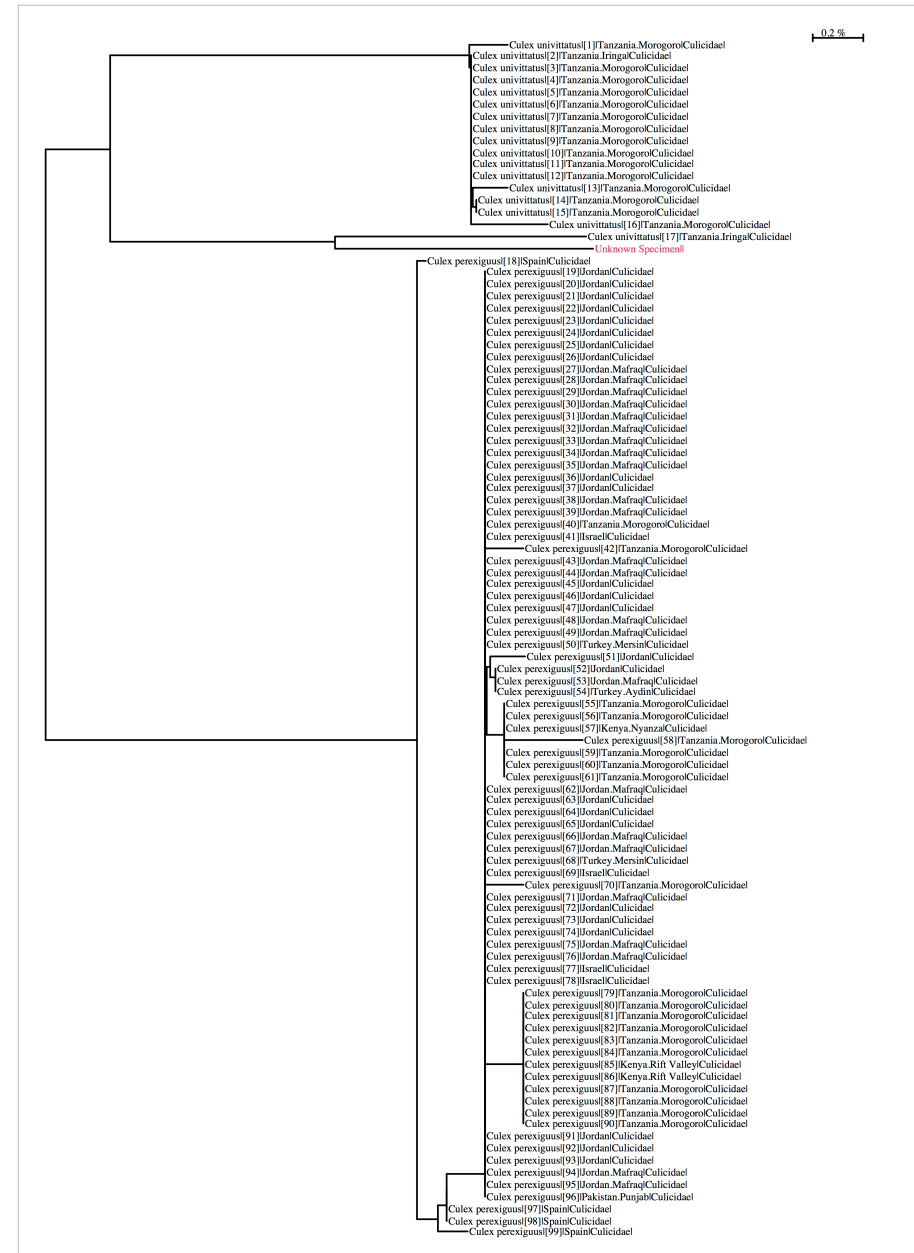

# Phylogenetic tree

➤ Specimen from Iberian Peninsula (Spai-7C5)

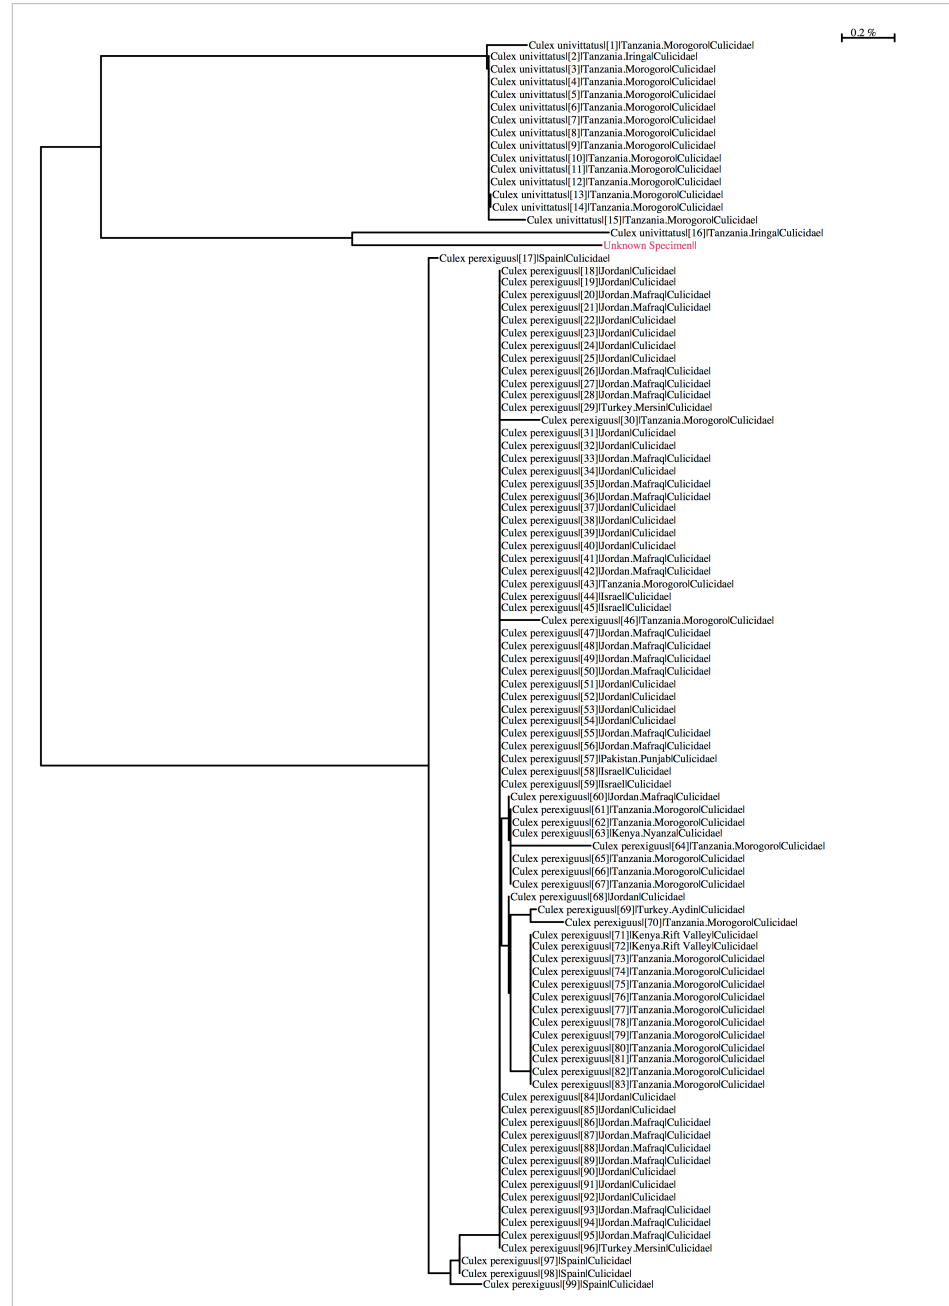

# Phylogenetic tree

➤ Specimen from South Africa (GAU1)

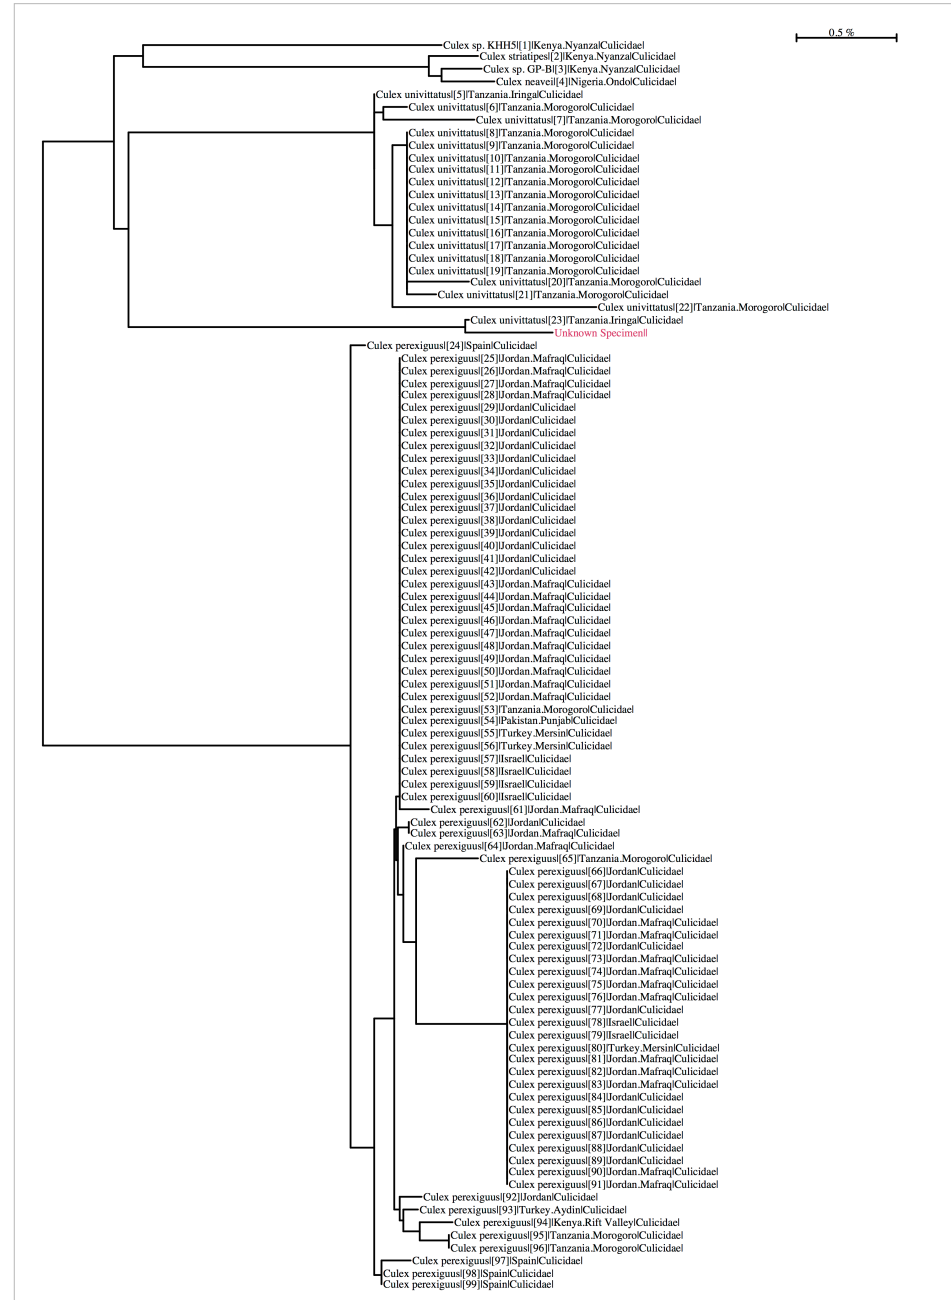



# Phylogenetic tree

➤ Specimen from Turkey  
(access number: KJ012109.1)

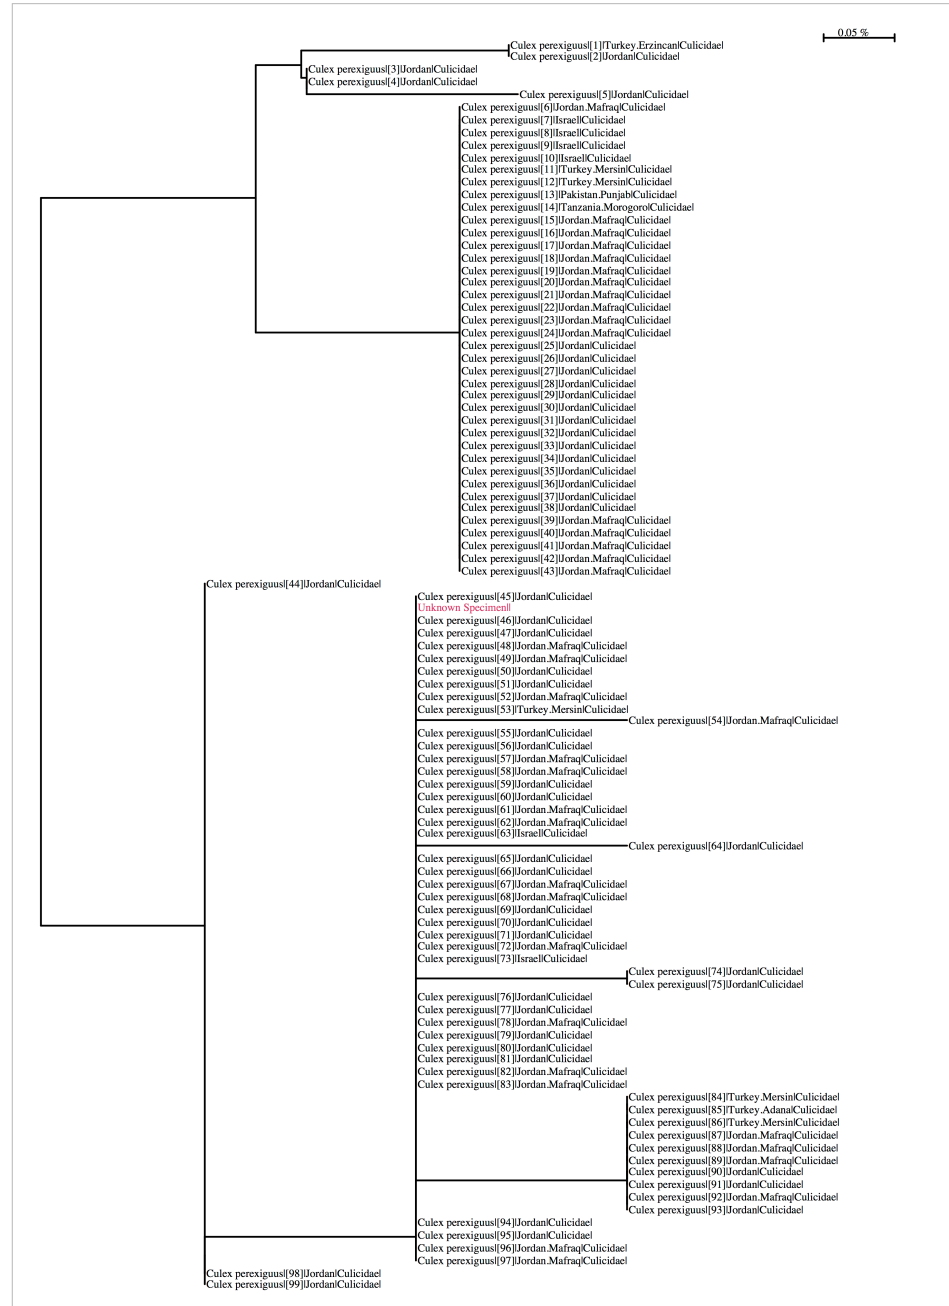

Supplement: 13071_2016_1877_MOESM6_ESM.pdf [file 13071_2016_1877_MOESM6_ESM.pdf]
