# Supplementary material for: Comparative morphological and molecular analysis confirms the presence of the West Nile virus mosquito vector, Culex univittatus, in the Iberian Peninsula
Source: PubMed Central journal article supplement (PMC5123335; doi:10.1186/s13071-016-1877-7), 2016-11-25
Supplement: 13071_2016_1877_MOESM1_ESM.pdf [file 13071_2016_1877_MOESM1_ESM.pdf]

**Adicional file 1 - Morphological characters for distinction between *Culex univittatus* and *Cx. perexiguus*, adapted from Jupp (1971), White (1975), and Harbach (1985, 1988).**

| Character                       | Species                                                                                                                                                                                                       |                                                                                                                                                                                                                                        |
|---------------------------------|---------------------------------------------------------------------------------------------------------------------------------------------------------------------------------------------------------------|----------------------------------------------------------------------------------------------------------------------------------------------------------------------------------------------------------------------------------------|
|                                 | <i>Culex univittatus</i> Theobald, 1901                                                                                                                                                                       | <i>Culex perexiguus</i> Theobald, 1903                                                                                                                                                                                                 |
| I. Ventral surface of proboscis | <ul style="list-style-type: none"> <li>• pale in middle</li> </ul>                                                                                                                                            | <ul style="list-style-type: none"> <li>• pale except at base</li> <li>• weakly pale on distal 0.25</li> </ul>                                                                                                                          |
| II. Postspiracular area         | <ul style="list-style-type: none"> <li>• tendency for scales to cover less than dorsal 0.5</li> </ul>                                                                                                         | <ul style="list-style-type: none"> <li>• tendency for scale to cover more than dorsal 0.5</li> </ul>                                                                                                                                   |
| III. Forefemur                  | <ul style="list-style-type: none"> <li>• sometimes with indistinct anterior pale stripe</li> </ul>                                                                                                            | <ul style="list-style-type: none"> <li>• usually with indistinct anterior pale stripe</li> </ul>                                                                                                                                       |
| IV. Midfemur                    | <ul style="list-style-type: none"> <li>• with complete distinct or indistinct anterior pale stripe</li> </ul>                                                                                                 | <ul style="list-style-type: none"> <li>• with or without incomplete faint or distinct anterior pale stripe</li> </ul>                                                                                                                  |
| V. Hindfemur                    | <p>proportion of the length of femur occupied by the dorso-anterior black stripe or “femoral index” (R)</p> <ul style="list-style-type: none"> <li>• <math>R \geq 80\%</math></li> </ul>                      | <ul style="list-style-type: none"> <li>• <math>R \leq 70\%</math></li> </ul>                                                                                                                                                           |
| VI. Hindtibia                   | <ul style="list-style-type: none"> <li>• with distinct anterior and posterior pale stripes on proximal 0.8, separated ventrally by complete dark stripe;</li> <li>• with distinct apical pale spot</li> </ul> | <ul style="list-style-type: none"> <li>• with distinct anterior and posterior pale stripes on proximal 0.8, partly separated on proximal 0.5 or less by weak ventral dark stripe;</li> <li>• with distinct apical pale spot</li> </ul> |
| VII. Wing                       |                                                                                                                                                                                                               |                                                                                                                                                                                                                                        |
| a. Costa                        | <ul style="list-style-type: none"> <li>• with short line of pale scales at base</li> </ul>                                                                                                                    | <ul style="list-style-type: none"> <li>• with short line of pale scales at base</li> </ul>                                                                                                                                             |
| b. Vein 2A                      | <ul style="list-style-type: none"> <li>• female usually with line of scales</li> </ul>                                                                                                                        | <ul style="list-style-type: none"> <li>• female occasionally with few scales</li> </ul>                                                                                                                                                |
| VIII. Male genitalia            |                                                                                                                                                                                                               |                                                                                                                                                                                                                                        |
| a. Seta <i>g</i>                | <ul style="list-style-type: none"> <li>• narrow, “leaflet index” <math>R1 = \text{width/length} * 100 \leq 50\%</math></li> </ul>                                                                             | <ul style="list-style-type: none"> <li>• broad, “leaflet index” <math>R1 = \text{width/length} * 100 \geq 50\%</math></li> </ul>                                                                                                       |
| b. Seta <i>f</i>                | <ul style="list-style-type: none"> <li>• tip narrow/unswollen</li> </ul>                                                                                                                                      | <ul style="list-style-type: none"> <li>• tip narrow/unswollen</li> </ul>                                                                                                                                                               |
| c. Ventral arm                  | <ul style="list-style-type: none"> <li>• longer than width of lateral plate at point of attachment</li> </ul>                                                                                                 | <ul style="list-style-type: none"> <li>• shorter than width of lateral plate at point of attachment</li> </ul>                                                                                                                         |
