# Supplementary material for: Comparative morphological and molecular analysis confirms the presence of the West Nile virus mosquito vector, Culex univittatus, in the Iberian Peninsula
Source: PubMed Central journal article supplement (PMC5123335; doi:10.1186/s13071-016-1877-7), 2016-11-25
Supplement: 13071_2016_1877_MOESM3_ESM.pdf [file 13071_2016_1877_MOESM3_ESM.pdf]

**Additional file 3: *cox1* mtDNA sequences retrieved from the GenBank database for sequence and phylogenetic analysis**

| Sequence Code                           | Accession Number | Fragment size (bp) | Species                     | Country  |
|-----------------------------------------|------------------|--------------------|-----------------------------|----------|
| KJ012109.1  <i>Cx. perexiguus</i>       | KJ012109.1       | 658                | <i>Cx. perexiguus</i>       | Turkey   |
| KJ012107.1  <i>Cx. perexiguus</i>       | KJ012107.1       | 658                | <i>Cx. perexiguus</i>       | Turkey   |
| KJ012106.1  <i>Cx. perexiguus</i>       | KJ012106.1       | 658                | <i>Cx. perexiguus</i>       | Turkey   |
| KJ012103.1  <i>Cx. perexiguus</i>       | KJ012103.1       | 658                | <i>Cx. perexiguus</i>       | Turkey   |
| KJ012108.1  <i>Cx. perexiguus</i>       | KJ012108.1       | 658                | <i>Cx. perexiguus</i>       | Turkey   |
| KF406802.1  <i>Cx. perexiguus</i>       | KF406802.1       | 658                | <i>Cx. perexiguus</i>       | Turkey   |
| KJ012104.1  <i>Cx. perexiguus</i>       | KJ012104.1       | 658                | <i>Cx. perexiguus</i>       | Turkey   |
| KJ012105.1  <i>Cx. perexiguus</i>       | KJ012105.1       | 658                | <i>Cx. perexiguus</i>       | Turkey   |
| HQ398886  <i>Cx. fuscocephala</i>       | HQ398886         | 658                | <i>Cx. fuscocephala</i>     | Vietnam  |
| KF406799  <i>Cx. fuscocephala</i>       | KF406799         | 658                | <i>Cx. fuscocephala</i>     | Pakistan |
| KF406798  <i>Cx. fuscocephala</i>       | KF406798         | 658                | <i>Cx. fuscocephala</i>     | Pakistan |
| KF406797  <i>Cx. fuscocephala</i>       | KF406797         | 658                | <i>Cx. fuscocephala</i>     | Pakistan |
| KJ012148.1  <i>Cx. pipiens</i>          | KJ012148.1       | 658                | <i>Cx. pipiens</i>          | Turkey   |
| KJ012143.1  <i>Cx. pipiens</i>          | KJ012143.1       | 658                | <i>Cx. pipiens</i>          | Turkey   |
| HG793546.1  <i>Cx. pipiens</i>          | HG793546.1       | 658                | <i>Cx. pipiens</i>          | Germany  |
| HF562800.1  <i>Cx. pipiens</i>          | HF562800.1       | 658                | <i>Cx. pipiens</i>          | Germany  |
| HF562725.1  <i>Cx. pipiens</i>          | HF562725.1       | 658                | <i>Cx. pipiens</i>          | Germany  |
| KM258199.1  <i>Cx. pipiens</i>          | KM258199.1       | 658                | <i>Cx. pipiens</i>          | Belgium  |
| KJ012161.1  <i>Cx. pipiens mol</i>      | KJ012161.1       | 658                | <i>Cx. pipiens</i>          | Turkey   |
| JQ958372.1  <i>Cx. pipiens</i>          | JQ958372.1       | 709                | <i>Cx. pipiens</i>          | Tehran   |
| HE997153.1  <i>Cx. pipiens</i>          | HE997153.1       | 673                | <i>Cx. pipiens</i>          | Germany  |
| FN395179.1  <i>Cx. pipiens mol</i>      | FN395179.1       | 1542               | <i>Cx. pipiens</i>          | Europe   |
| FN395204.1  <i>Cx. quinquefasciatus</i> | FN395204.1       | 1542               | <i>Cx. quinquefasciatus</i> | Pakistan |
| KJ012173.1  <i>Cx. quinquefasciatus</i> | KJ012173.1       | 658                | <i>Cx. quinquefasciatus</i> | Turkey   |
| KC970297.1  <i>Cx. quinquefasciatus</i> | KC970297.1       | 658                | <i>Cx. quinquefasciatus</i> | India    |
| KF407827.1  <i>Cx. quinquefasciatus</i> | KF407827.1       | 658                | <i>Cx. quinquefasciatus</i> | Pakistan |
| KF407713.1  <i>Cx. quinquefasciatus</i> | KF407713.1       | 658                | <i>Cx. quinquefasciatus</i> | Pakistan |
| KF407091.1  <i>Cx. quinquefasciatus</i> | KF407091.1       | 658                | <i>Cx. quinquefasciatus</i> | Pakistan |
| HE997083  <i>Cx. torrentium</i>         | HE997083         | 658                | <i>Cx. torrentium</i>       | Germany  |
| HE997096  <i>Cx. torrentium</i>         | HE997096         | 658                | <i>Cx. torrentium</i>       | Germany  |
| HE997101  <i>Cx. torrentium</i>         | HE997101         | 658                | <i>Cx. torrentium</i>       | Germany  |
| HE997142  <i>Cx. torrentium</i>         | HE997142         | 658                | <i>Cx. torrentium</i>       | Germany  |
| HG793632  <i>Cx. torrentium</i>         | HG793632         | 658                | <i>Cx. torrentium</i>       | Germany  |
| KJ012204.1  <i>Cx. theileri</i>         | KJ012204.1       | 658                | <i>Cx. theileri</i>         | Turkey   |
| FJ210899.1  <i>Cx. theileri</i>         | FJ210899.1       | 658                | <i>Cx. theileri</i>         | Iran     |
| HE610460  <i>Cx. theileri</i>           | HE610460         | 688                | <i>Cx. theileri</i>         | Portugal |
| HE610457  <i>Cx. theileri</i>           | HE610457         | 650                | <i>Cx. theileri</i>         | Portugal |
| Port-3427 <i>Cx. theileri</i>           | LC102116         | 756                | <i>Cx. theileri</i>         | Portugal |
| Port-3430 <i>Cx. theileri</i>           | LC102115         | 740                | <i>Cx. theileri</i>         | Portugal |
| Spai-E_ <i>Ae. caspius</i>              | LC090050*        | 648                | <i>Ae. caspius</i>          | Spain    |

\* This sequence was used as outgroup.
