# Supplementary material for: Comparative morphological and molecular analysis confirms the presence of the West Nile virus mosquito vector, Culex univittatus, in the Iberian Peninsula
Source: Parasit Vectors. 2016 Nov 25;9:601. doi: 10.1186/s13071-016-1877-7 (PMC5123335; doi:10.1186/s13071-016-1877-7)
Supplement: Additional file 7: — Variable sites found in a 637 bp region of cox1 mtDNA alignment of Univittatus subgroup. Abbreviations: SAfr, Culex univittatus from South Africa; Port, specimens from Portugal; Spai, specimens from Spain. (PDF 86 kb) [file 13071_2016_1877_MOESM7_ESM.pdf]

Additional file 7: Variable sites found in a 637 bp region of *cox1* mtDNA alignment of Univittatus subgroup. Abbreviations: SAfr, *Culex univittatus* from South Africa; Port, specimens from Portugal; Spai, specimens from Spain.

[illegible]
